# Supplementary material
Source: publisher figshare collection journal article supplement (https://gsajournals.figshare.com/articles/dataset/_/7505762)
Supplement: Supplementary file 1 [file 2]

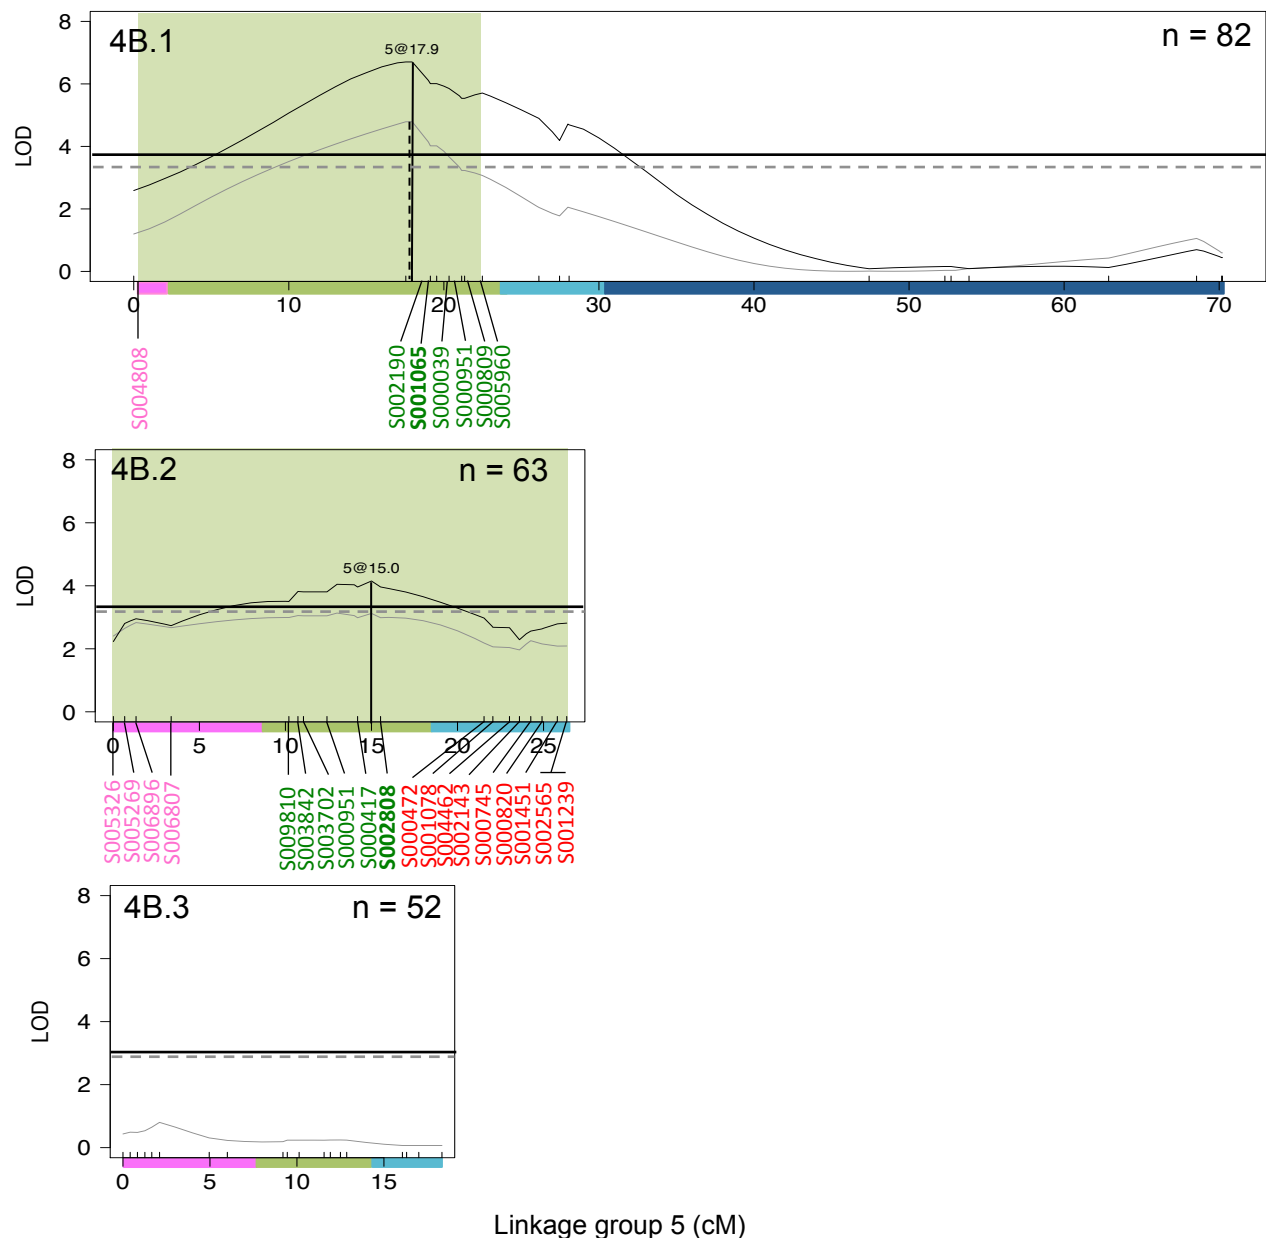

**Figure S4.** LOD profiles of the final multiple QTL mapping models (MQM, shown in black) and standard interval mapping models (SIM, shown in grey) for 4B families. The shaded areas indicate 1.5-LOD support confidence intervals, the vertical lines indicate the locations of the peaks and the horizontal lines indicate the significance thresholds for QTL; continuous and dotted lines are from MQM and SIM respectively. Clusters of markers on the linkage group are represented by colored bars on the linkage maps and the same color scheme from Figure 4, 5 and S3 is used. Markers within the 1.5-LOD support confidence intervals were labeled and markers with the highest LOD scores from MQM and SIM are marked in bold
