# Supplementary material
Source: publisher figshare collection journal article supplement (https://gsajournals.figshare.com/articles/dataset/_/7505762)
Supplement: Supplementary file 1 [file 3]

## Sheet: Sheet1
Table S1. List of conserved domains in the 11 Drosophila melanogaster candidate genes for variation in interpulse interval of courtship song showing gene abbreviations, conserved domain names, accession numbers, positions, E-values of the blast search in the NCBI conserved domain database, and the group of organisms in which the domain is conserved from the NCBI HomoloGene database
	Gene abbreviation	CD name	CD accession	CD start	CD end	E value	CD conserved in
	cac	Ion_trans	pfam00520	8365	8493	0.000474	Bilateria
	cac	Ion_trans	pfam00520	13037	13606	1.13e-21	Bilateria
	cac	Ion_trans	pfam00520	15908	16396	1.64e-28	Bilateria
	cac	Ion_trans	pfam00520	30819	30992	7.32e-05	Bilateria
	cac	Ion_trans	pfam00520	34929	35147	1.69e-07	Bilateria
	cac	GPHH super family	cl25190	35148	35213	3.93e-07	Bilateria
	cac	GPHH super family	cl25190	35832	35981	3.09e-19	Bilateria
	cac	Ca_chan_IQ	pfam08763	36254	36430	6.28e-20	Bilateria
	CG15630	I-set super family	cl28434	56577	56687	4.69e-06	Diptera
	CG15630	IG_like	smart00410	57746	57985	6.8e-11	exclusive to Drosophila rerio
	CG6746	PTPLA	pfam04387	332	817	2.18e-62	Eukaryota
	fru	BTB	pfam00651	109876	110220	2.21e-14	Diptera
	fru	ZnF_TTF super family	cl02692	113817	114044	1.72e-16	unknown
	mle	DSRM	smart00358	219	347	5.66e-09	Bilateria
	mle	HA2 super family	cl27160	2264	2764	5.34e-46	Bilateria
	mle	HrpA	COG1643	3268	4884	2.16e-83	Bilateria
	mef2	MADS super family	cl00109	38134	38316	2.82e-24	Bilateria
	mef2	HJURP_C super family	cl13744	39136	39318	5.4e-06	Bilateria
	para	Calreticulin	pfam00262	8050	9171	0	Eukaryota
	para	Ion_trans	pfam00520	27324	27551	3.76e-14	Bilateria
	para	Na_trans_cytopl super family	cl13384	34198	34374	9.74e-06	Bilateria
	para	SAP	smart00513	35190	35288	6.66e-05	unknown
	para	AIR1 super family	cl26705	36192	36353	7.05e-06	unknown
	para	Ion_trans	pfam00520	43581	43751	0.000591	Bilateria
	para	Ion_trans	pfam00520	43948	44106	6.44e-06	Bilateria
	para	Ion_trans	pfam00520	45052	45213	2.31e-05	Bilateria
	para	Na_trans_assoc super family	cl05828	46582	46716	6.42e-07	Bilateria
	para	Na_trans_assoc super family	cl05828	50004	50405	1.31e-11	Bilateria
	para	Ion_trans	pfam00520	51598	51777	1.21e-05	Bilateria
	para	Ion_trans	pfam00520	57341	57469	0.000497	Bilateria
	para	Ion_trans	pfam00520	58528	58662	0.00344	Bilateria
	para	Ion_trans	pfam00520	59288	59413	0.000205	Bilateria
	para	Na_channel_gate	cd13433	59381	59515	4.08e-17	Bilateria
	para	Ion_trans	pfam00520	61658	61885	0.000659	Bilateria
	para	Ion_trans	pfam00520	66285	66605	5.04e-11	Bilateria
	para	Ion_trans	pfam00520	68302	68526	5.46e-05	Bilateria
	para	GPHH super family	cl25190	68533	68703	1.53e-06	unknown
	slo	Ion_trans_2	pfam07885	13170	13310	2.66e-06	Bilateria
	slo	BK_channel_a	pfam03493	29327	29827	3.15e-18	Bilateria
	slo	BK_channel_a super family	cl04110	31282	31395	3.56e-08	Bilateria
	sps2	PurM-like super family	cl10019	208	762	1.09e-28	Bilateria
	sps2	PurM-like super family	cl10019	816	1382	1.25e-33	Bilateria
	syn1	PH-like super family	cl17171	9423	9518	0.00622	unknown
	syn1	PDZ_signaling	cd00992	10264	10503	5.3e-20	unknown
	syn1	DUF4794	pfam16042	13031	13270	0.00791	unknown
	syn1	PH-like super family	cl17171	22734	22850	3.17e-13	unknown
	CG34460	SVWC	smart01318	37	94	0.00752	Arthropods
