# Supplementary material
Source: publisher figshare collection journal article supplement (https://gsajournals.figshare.com/articles/dataset/_/7505762)
Supplement: Supplementary file 2 [file 2]

Archive with 14 entries (14 files):
- Figure S1.jpg
- Figure S2.pdf
- Figure S3.pdf
- Figure S4.pdf
- Figure S5.jpg
- Figure S6.pdf
- File S1.pdf
- Table S1.xlsx
- Table S2.xlsx
- Table S3.xlsx
- Table S4.xlsx
- Table S5.xlsx
- Table S6.xlsx
- Table S7.xlsx
