# Supplementary material
Source: publisher figshare collection journal article supplement (https://gsajournals.figshare.com/articles/dataset/_/7505762)
Supplement: Supplementary file 2 [file 2 › Figure S2.pdf]

A) LG1

4B.1

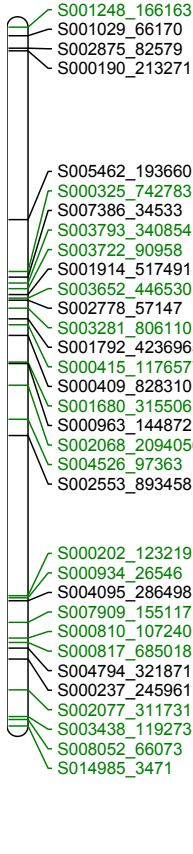

4B.2

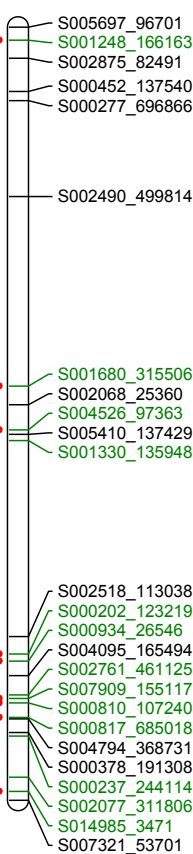

4B.3

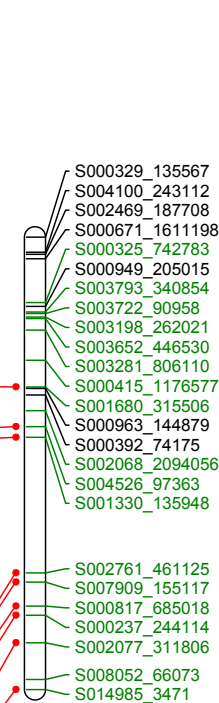

4C.5

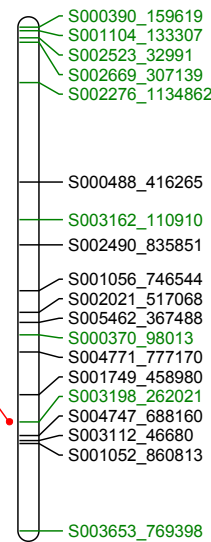

4C.9

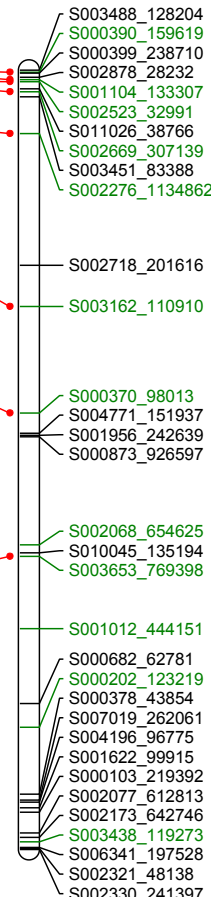

4E.1

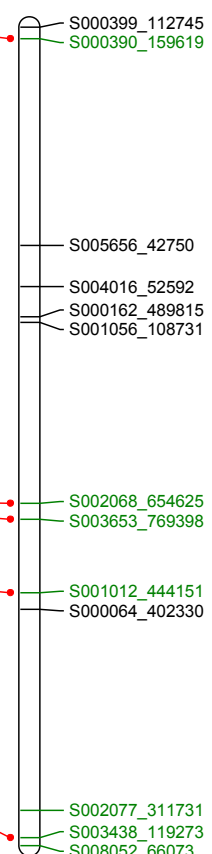

## B) LG2

4B.1

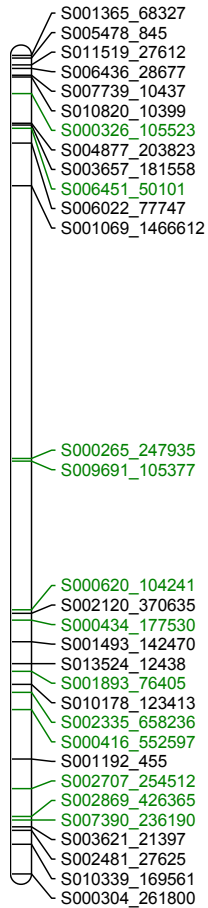

4B.2

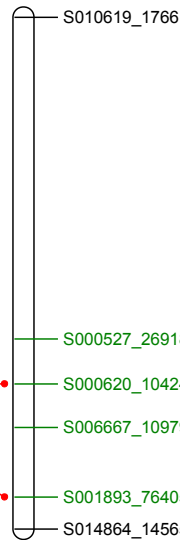

4B.3

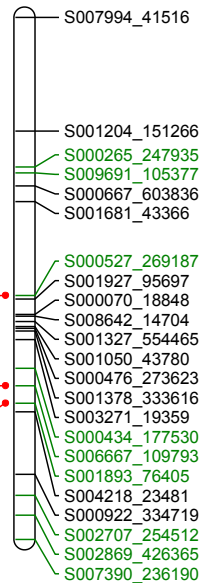

4C.5

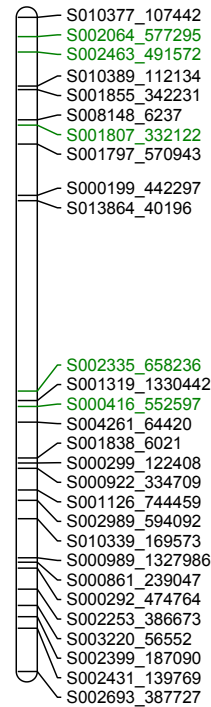

4C.9

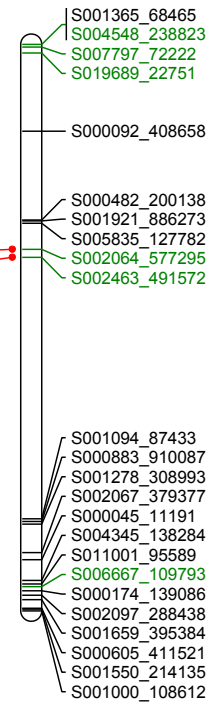

4E.1

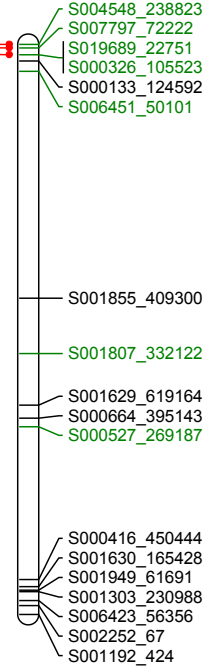

C) LG3

4B.1

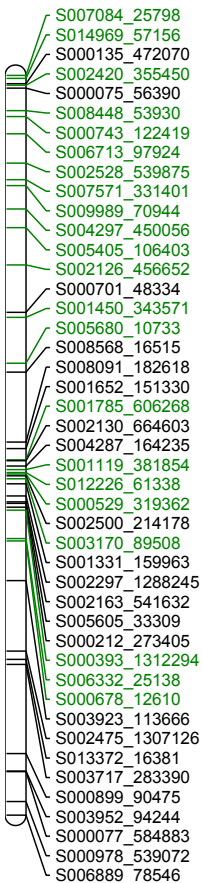

4B.2

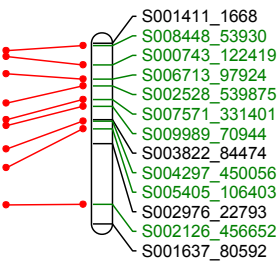

4B.3

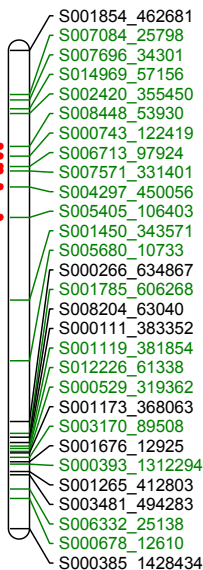

4C.5

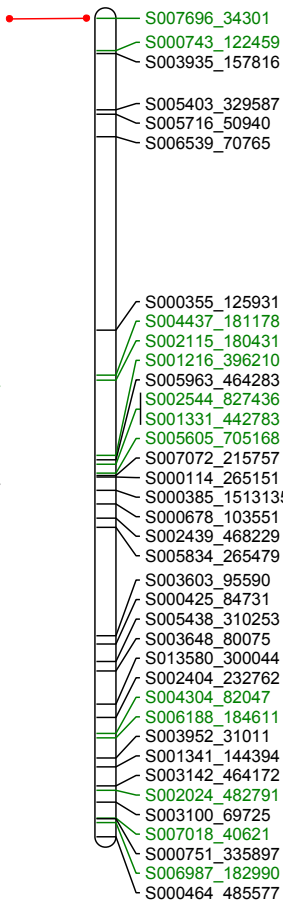

4C.9

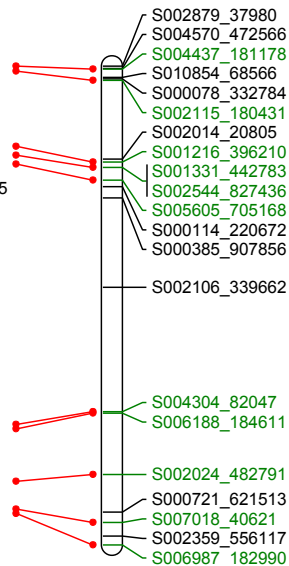

4E.1

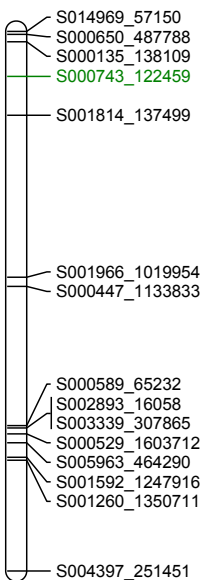

D) LG4

4B.1

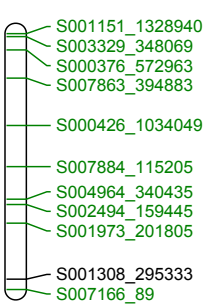

4B.2

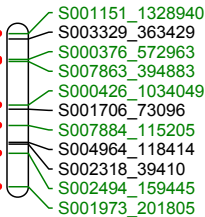

4B.3

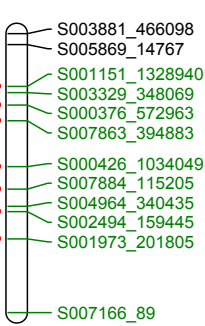

4C.5

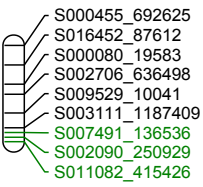

4C.9

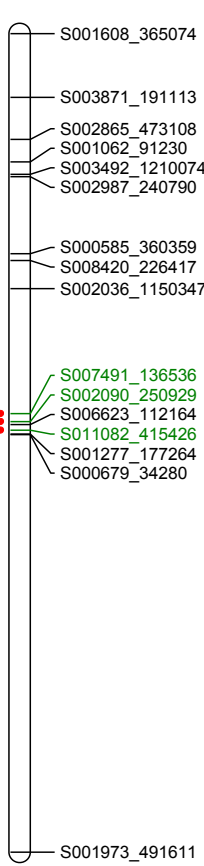

4E.1

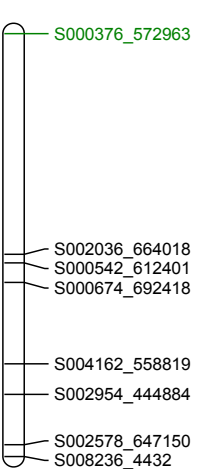

E) LG6

4B.1

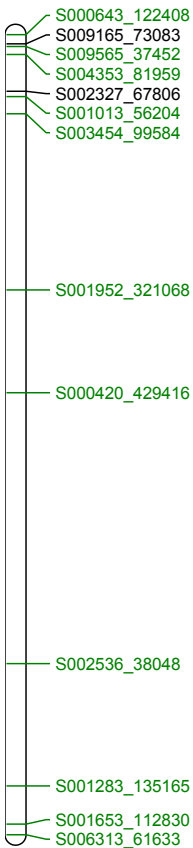

4B.2

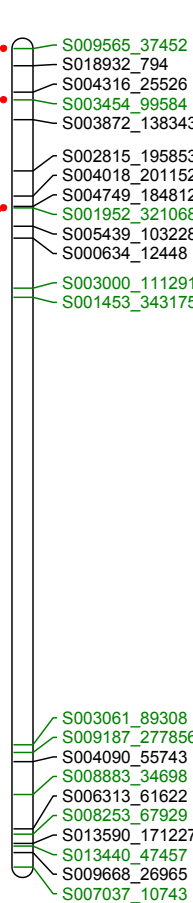

4B.3

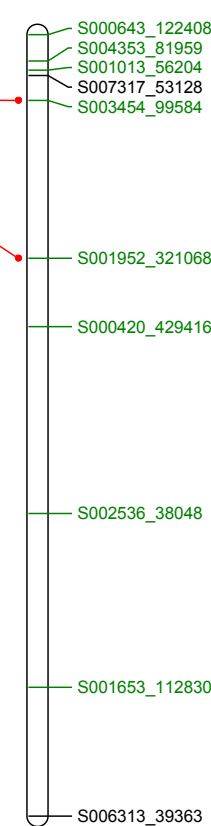

4C.5

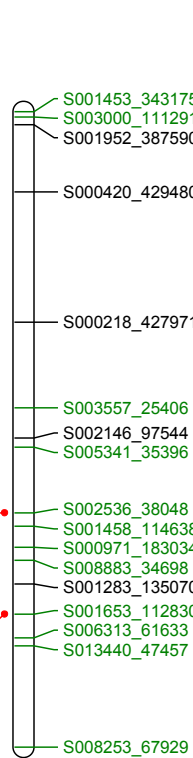

4C.9

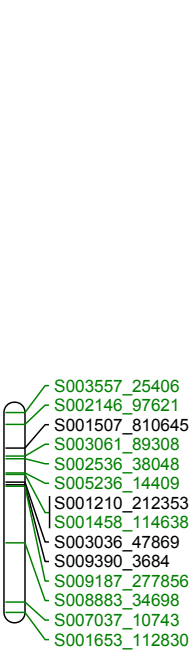

4E.1

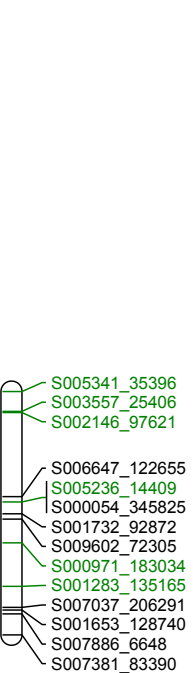

## F) LG7

4B.1

4B.2

4B.3

4C.5

4C.9

4E.1

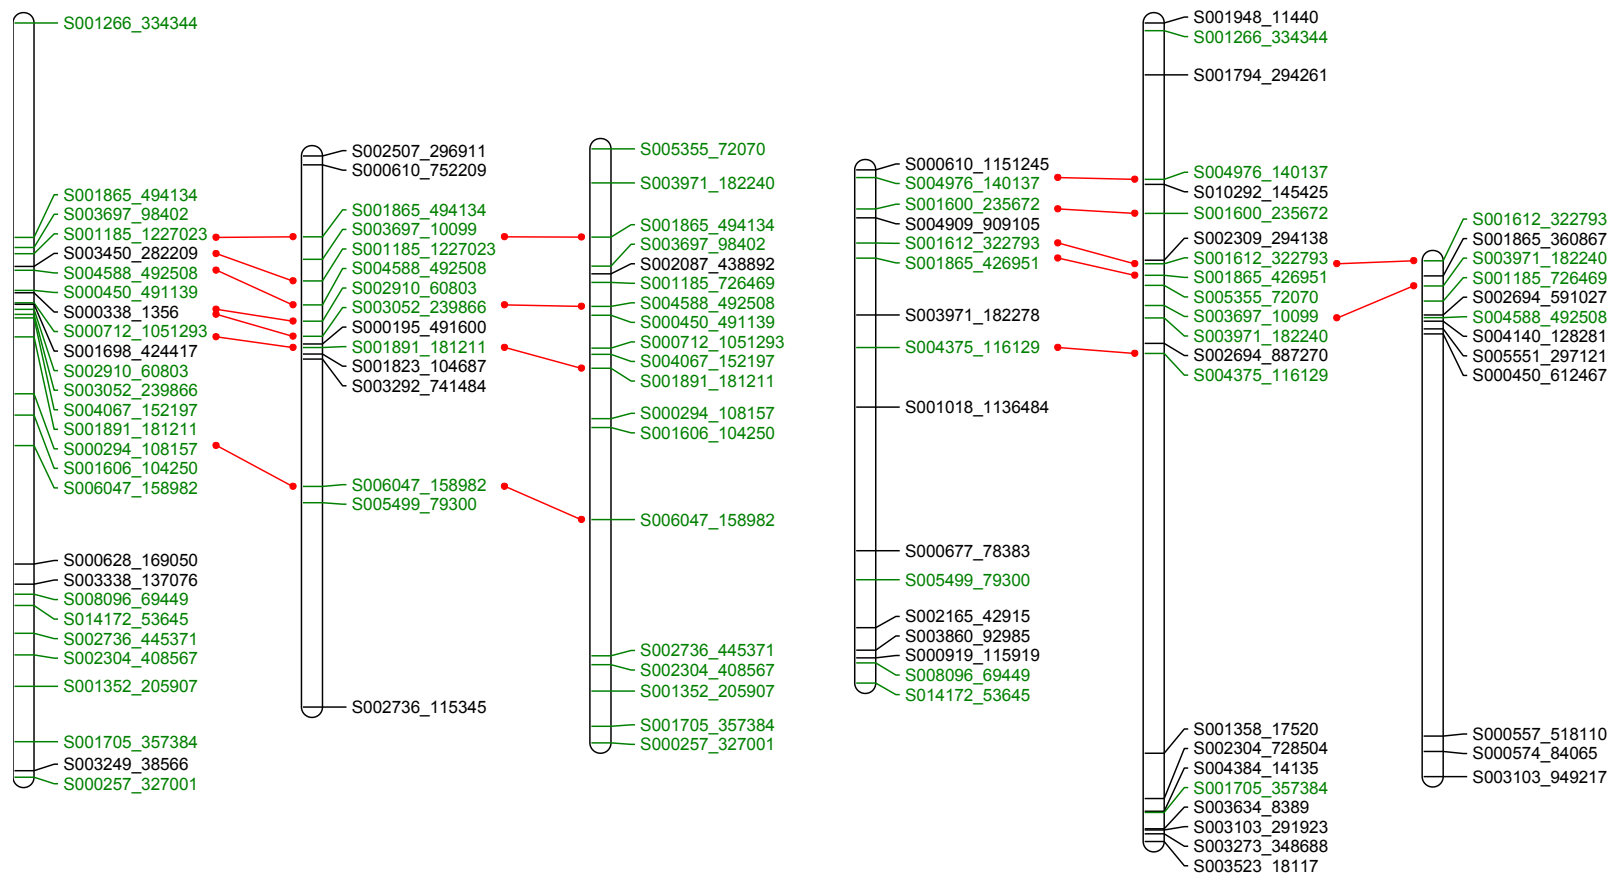

**Figure S2.** Homology and synteny of A) LG1, B) LG2, C) LG3, D) LG4, E) LG6, and F) LG7 among 6  $F_2$  families. Markers in green are shared between at least two families (including both adjacent and non-adjacent families in the figure), and red lines join the same marker in adjacent linkage maps
