# Supplementary material
Source: publisher figshare collection journal article supplement (https://gsajournals.figshare.com/articles/dataset/_/7505762)
Supplement: Supplementary file 2 [file 2 › Figure S3.pdf]

A)

4C.5

4C.9

4C.9

4E.1

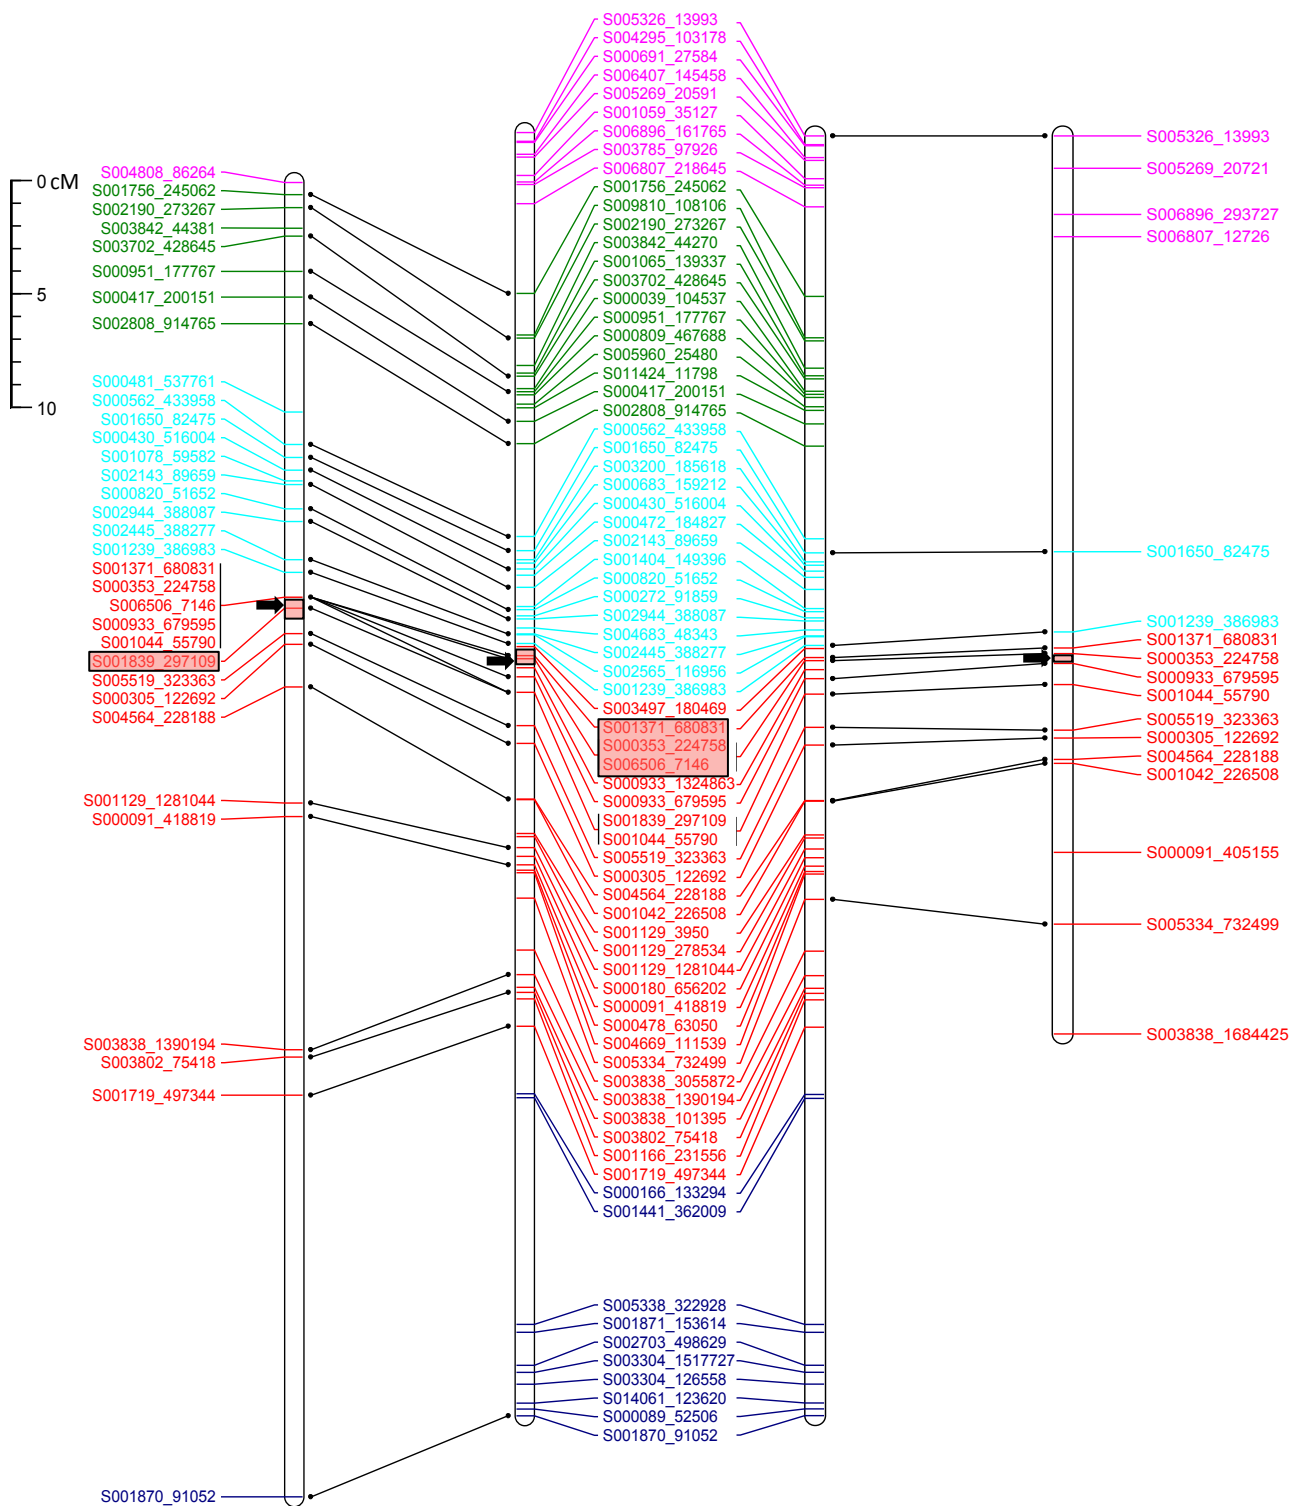

**B) 4B.1**

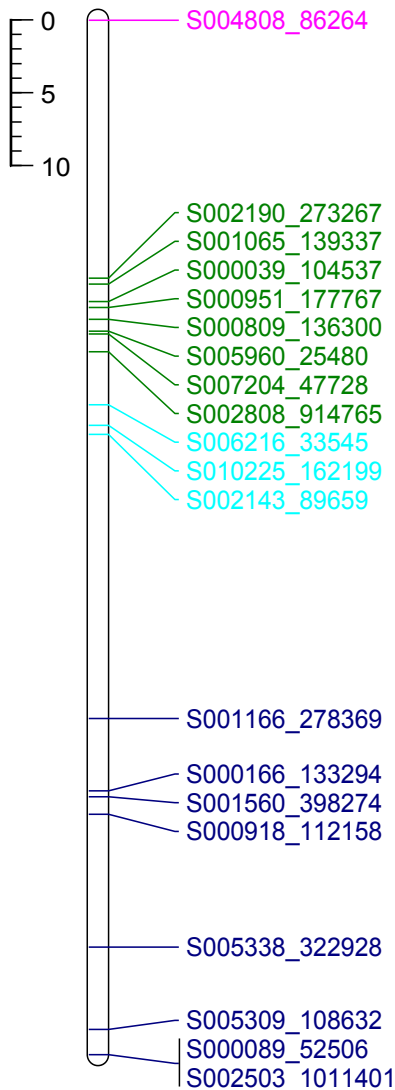

**4B.2**

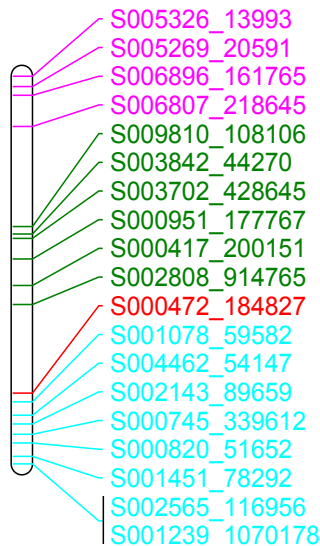

**4B.3**

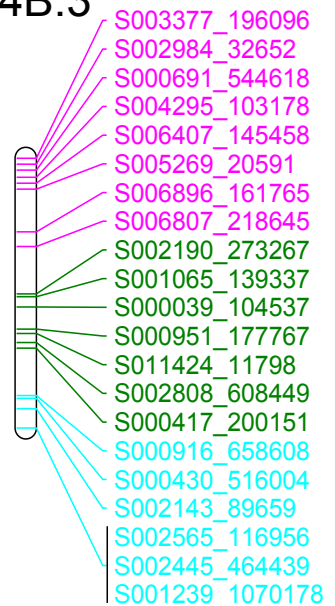

**Figure S3.** Linkage maps of linkage group 5 in A) 4C.5, 4C.9, and 4E.1 and B) 4B.1, 4B.2 and 4B.3. Different clusters of markers are color coded the same way as in Figure 4 and 5. The 1.5-LOD confidence intervals (CIs) of the major QTL and markers within the CIs from MQM in 4C and 4E families were marked with red boxes. The black arrows indicate the QTL peak locations from MQM
