# Supplementary material
Source: publisher figshare collection journal article supplement (https://gsajournals.figshare.com/articles/dataset/_/7505762)
Supplement: Supplementary file 2 [file 2 › Figure S6.pdf]

Query: KDR12169.1 Cyclic nucleotide-gated olfactory channel [Zootermopsis nevadensis]  
Target: Lko0575001371:300000-400000 [revcomp]  
Model: protein2genome:local  
Raw score: 2922  
Query range: 0 -> 1146  
Target range: 84105 -> 12523

1 : MetLysLeuArgThrThrValGlnLeuSerGlyAlaIle<-><->ThrThrIleGlnLys : 18  
MetLysLeuArgThrThrValGlnLeuSerGlyAlaIleSerSerThrIleThrGlnLys  
84105 : ATGAAGCTGCGGACACGGTGCAGCTGTCCGGAGCCATCTCGTCAACCATCACGCAGAAG : 84048  
19 : LysProProLeuLysArgGluAspSerPheLeuLysArgPheSerThrArgGlnIlePro : 38  
LysAlaProLeuLysArgGluAspSerPheLeuLysArgPheSerThrArgGlnValPro  
84047 : AAGGCGCCTCTCAAGCGAGAAGACTCGTTCCTCAAGCGCTTCTCCACTCGCCAAGTGCCC : 83988  
39 : GluThrGln >>>> Target Intron 1 >>>> GluThrMetAspThrGlyAspA : 49  
1481 bp  
GluAlaGln++ ++GluThrValAspThrGlyAspG  
83987 : GAGGCGCAGgt.....agGAGACTGTGGACACAGGCGACG : 82474  
50 : spGlyAspGlyGlyProSerSerGlnSerThrAlaSerThrArgArgArgArgArgL : 69  
luGlyGlyGluGlyGlyAlaAspThrAlaSerArgAspGluArgArgArgArgArgA  
82473 : AAGGAGGTGAAGGCGGCGCCGATACGGCGAGTCGTGACGAGCGACGCCGCGCGCGAC : 82414  
70 : ysGlnArgLeuProArgThrValValAsnProAspGluAsnPheTyrPheTyrTrpLeuP : 89  
rgGlnArgLeuProArgThrValValAsnProAspGluAsnPheTyrPheTyrTrpLeuL  
82413 : GTCAACGTCTCCCTCGCACCGTCGTCAACCCGACGAGAACTTCTACTTCTATTGGTTGC : 82354  
90 : heLeuLeuSerAlaCysValLeuTyrAsnLeuTrpThrLeuIleValArgGlnSerPheP : 109  
euValLeuThrAlaCysValLeuTyrAsnLeuTrpThrLeuIleValArgGlnSerPheP  
82353 : TGGTGCTCACAGCGTGCCTCTTACAACCTGTGGACACTCATCGTTCGCCAGAGTTTCC : 82294  
110 : roGluLeuGlnSerGlyAlaThrIleLeuTrpPheThrCysAspGlyPheSerAspAlaV : 129  
roGluLeuGlnAlaAlaAlaSerSerPheTrpThrAlaAlaAspAlaPheSerAspThrV  
82293 : CGGAGCTCCAGGCGGCCGCTTCGTCTTCTGGACGGCTGCAGACGCTTCTCCGACACTG : 82234  
130 : alPheLeuLeuAspValAlaValGlnPheArgThr{G} >>>> Target Intron : 141  
alCysValLeuAspValValValGlnPheArgThr{G}++ 852 bp  
82233 : TGTGCGTACTAGACGTGGTCTGTCAGTTCCTGACG{G}gt..... : 82194  
142 : 2 >>>> {y}TyrLeuGluGlnGlyLeuMetValTyrAspSerLysLysLeuAlaGlyH : 158  
++{y}TyrLeuGluGlnGlyLeuMetValTyrAspSerLysLysLeuAlaGlyH  
82193 : .....ag{C}TATCTGGAACAGGGTCTGATGGTATACGACAGCAAGAAGTTAGCTGGCC : 81295  
159 : isTyrIleArgSerArgAlaPheLeuMetAspLeuCysAlaLeuLeuProLeuAspLeuL : 178  
isTyrValArgSerArgAlaPheLeuMetAspLeuAlaAlaLeuLeuProLeuAspLeuL  
81294 : ATTACGTACGCTCCAGAGCCTTCCTCTGGATCTGGCCGATTGCTACCTCTAGATCTGC : 81235  
179 : euGlnPheTyrValGlyIleGlnProIleLeuArgPheProArgPheLeuLysValTyrA : 198  
euGlnPheAlaThrGlyProLeuProIleLeuArgCysProArgPheLeuLysIleTyrA  
81234 : TCCAGTTCGCGACGGGACCGCTCCCCATCTTGCCTGCGCTTCCTTAAGATCTACC : 81175  
199 : rgValTyrAsnTyrTyrTyrMetValGluSerArgThrValTyrProAsnLeuTrpArgV : 218  
rgValTyrHisTyrTyrTyrMetValGluSerArgThrValTyrProAsnLeuTrpArgV

} PF00520  
lon\_trans





[illegible]

[illegible]

```

                                ++{is}AspGluTyrPheGlyGluValIleGlyGlyIleLy
17806 : .....ag{AC}GACGAATACTTCGGGGAGGTGATCGGCGGCATCAA : 13470

    1102 : sGlnValIleGlnGlyHisLeu >>>> Target Intron 19 >>>>   GluAspVa : 1111
          |||||:::||||| 809 bp |||:::|
          sGlnValLeuGlnAlaHisLeu++ ++GluGluIl
13469 : GCAGGTGCTGCAGGCGCACTTgt.....agGAGGAGAT : 12631

    1112 : lGlnAsnLysPheGlnSerGlnPheGlnSerLeuGluLeuGluValLysArgArgAspGl : 1131
          |||||:::||||| |||:::|
          eGlnSerLysPheGlnArgArgPheGlnSerLeuGluLeuGluValArgLysArgAspGl
12630 : TCAGAGCAAGTTTCAACGTCGCTTCCAGTCCCTGGAGCTGGAGGTGCGCAAGCGTGACGA : 12571

    1132 : uIleIleSerGlnLeuGlnLysArgIleHisGluLeuGluValCys : 1146
          |||||:::||||| |||:::|
          uIleIleSerGlnLeuGlnLysArgIleArgGluLeuGluValCys
12570 : AATCATCAGTCAATTACAGAAGCGCATCCGCGAACTCGAGGTATGT : 12524

```

**Figure S6.** Alignment between protein sequences of the termite *Zootermopsis nevadensis* cyclic nucleotide-gated olfactory channel-like protein (NCBI accession: KDR12169.1) and the putative cyclic nucleotide-gated ion channel-like gene of *Laupala* using the protein2genome local exhaustive model in Exonerate. The red and blue shaded areas are the conserved domain regions. The conserved domain Ion\_trans2 (PF07885) in both sequences is nested within Ion\_trans, hence, is not shown. The red arrow indicates the non-synonymous SNP between *L. kohalensis* and *L. paranigra*, and the red box indicates the amino acid affected by this SNP
