# Supplementary material
Source: publisher figshare collection journal article supplement (https://gsajournals.figshare.com/articles/dataset/_/7505762)
Supplement: Supplementary file 2 [file 2 › Table S2.xlsx]

## Sheet: Sheet1
Table S2. Summary statistics of the maps of seven linkage groups in six F2 families
	Family	Linkage group	# of markers	Median individual marker depth	Size of the linkage map (cM)	Median marker interval size (cM)
	4B.1	1	33	99.84	97.016	1.14
	4B.1	2	31	112.64	94.22	1.21
	4B.1	3	45	87.38	98.74	0.89
	4B.1	4	11	112.33	32.89	2.99
	4B.1	5	20	81	70.209	1.159
	4B.1	6	20	125.7	60.81	2.04
	4B.1	7	27	116	59.75	1.24
	4B.2	1	25	86.95	107.31	1.98
	4B.2	2	6	74.04	58.87	5.26
	4B.2	3	13	147.58	24.06	1.88
	4B.2	4	11	119.7	19.7	1.67
	4B.2	5	19	155.7	26.348	0.66
	4B.2	6	23	168.9	62.16	0.98
	4B.2	7	15	109.2	43.69	1.26
	4B.3	1	25	151.9	62.78	1.44
	4B.3	2	23	89.7	60.13	1.81
	4B.3	3	29	99.4	63.79	1.1
	4B.3	4	12	129	35.88	2.13
	4B.3	5	21	167.9	18.336	0.514
	4B.3	6	10	131.6	59.35	5.21
	4B.3	7	19	134.2	47.15	2.01
	4C.5	1	19	173.7	69.87	2.7
	4C.5	2	28	142	75.34	1.83
	4C.5	3	37	139.3	109.21	1.68
	4C.5	4	9	163.8	12.41	1.54
	4C.5	5	33	166.1	65.71	0.66
	4C.5	6	17	157.1	48.25	1.81
	4C.5	7	16	144.1	40.75	1.98
	4C.9	1	33	206.7	108.24	0.69
	4C.9	2	24	189.7	65.17	0.43
	4C.9	3	21	80.5	63.91	1.14
	4C.9	4	16	71.2	105.25	1.62
	4C.9	5	73	166.7	64.143	0.44
	4C.9	6	15	180.4	20.59	0.7
	4C.9	7	22	116.9	64.95	0.93
	4E.1	1	13	59.5	113.61	4.03
	4E.1	2	18	201.5	65.61	0.99
	4E.1	3	15	149.3	71.96	1.17
	4E.1	4	8	123.6	54.4	3.91
	4E.1	5	17	137	45.019	1.371
	4E.1	6	14	86.1	18.52	0.86
	4E.1	7	12	171.4	40.87	1.18
