# Supplementary material
Source: publisher figshare collection journal article supplement (https://gsajournals.figshare.com/articles/dataset/_/7505762)
Supplement: Supplementary file 2 [file 2 › Table S3.xlsx]

## Sheet: Sheet1
Table S3. Multiple QTL mapping results for significant QTL on linkage group other than 5 for five F2 mapping populations
Family	Sample size	Linkage group	QTL location (cM)	LOD score	1.5-LOD CI (cM)	Marker with highest LOD score	Additive effect size (pps)	% species difference explained	% F2 variance explained
4B.1	83	1	64	4.7	50.00-81.00	S002553_893458	0.06±0.01	1.99	13.11
4B.1	83	7	45	7.01	31.00-56.00	S001865_494134	0.07±0.01	2.33	20.96
4B.2	63	7	30	3.63	19.00-43.69	S002910_60803	0.10±0.02	3.32	18.55
4B.3	52	1	41	5.03	0.00-54.00	S002761_461125	0.08±0.01	2.66	27.45
4B.3	52	7	44	4.7	31.38-47.15	S003971_182240	0.08±0.01	2.66	25.22
4C.5	85	1	0.55	5.49	0.00-10.60	S001104_133307	0.03±0.01	0.1	1.11
4C.5	85	2	50.68	4.19	41.60-75.34	S001838_6021	−0.04±0.01	1.33	0.82
4C.5	85	3	60.89	18.12	57.40-65.60	S002115_180431	0.08±0.01	2.66	5.35
4C.5	85	7	39.11	5.39	28.20-40.75	S008096_69449	0.02±0.01	0.66	1.09
4E.1	127	1	112.54	8.44	109.00-113.61	S003438_119273	0.03±0.01	0.1	0.62
4E.1	127	3	70.51	19.82	68.80-71.80	S000135_138109	0.03±0.01	0.1	1.9
4E.1	127	4	0	8.96	0.00-7.42	S000376_572963	0.02±0.01	0.66	0.67
4E.1	127	7	0	17.52	0.00-1.19	S001612_322793	0.02±0.01	0.66	1.59
4E.1	127	3*7 interaction	−	9.26	−	−	−0.05±0.02	1.66	0.7
