# Supplementary material
Source: publisher figshare collection journal article supplement (https://gsajournals.figshare.com/articles/dataset/_/7505762)
Supplement: Supplementary file 2 [file 2 › Table S4.xlsx]

## Sheet: Sheet1
Table S4. Frequency distribution of the F2 male pulse rate and Chi-squared test result for a 1:2:1 Mendelian segregation ratio in 4C and 4E families
family	#♂ in bin1	#♂ in bin2	#♂ in bin3	Χ2	p
4C.5	21	45	19	0.38824	0.8236
4C.9	93	170	74	2.1691	0.338
4E.1	28	64	35	0.77953	0.6772
