# Supplementary material
Source: publisher figshare collection journal article supplement (https://gsajournals.figshare.com/articles/dataset/_/7505762)
Supplement: Supplementary file 2 [file 2 › Table S5.xlsx]

## Sheet: Sheet1
Table S5. Functional annotation of the 66 predicted genes on the five focal scaffolds within and flanking the 1.5-LOD support confidence interval of the major QTL peak in 4C.9
Gene index	Scaffold	Start position (base)	Gene length (base)	Best blast hit description	GO biological processes	# SNP within gene	# up- and down-stream SNP
1	S003497	178201	3221	Ribosome maturation protein SBDS	mature ribosome assembly	3	15
2	S003497	181734	3921	Cob(I)yrinic acid a,c-diamide adenosyltransferase, mitochondrial-like	transferase activity†	5	11
3	S003497	186416	1334	---NA---	---NA---	0	12
4	S003497	189490	8451	Gametogenetin-binding protein 2-like	---NA---	16	11
5	S001371	21818	19570	Beta-galactosidase-1 like protein 2	carbohydrate metabolic process	0	0
6	S001371	43619	2006	N-alpha-acetyltransferase 25 NatB auxiliary subunit	acyl-carrier-protein biosynthetic process	0	0
7	S001371	62105	9611	N-terminal acetyltransferase B subunit MDM20	transferase activity†	1	0
8	S001371	75337	6865	DNA repair protein XRCC3 isoform X1	DNA repair	0	0
9	S001371	83018	2791	Protein MEMO1	tyrosine metabolic process; regulation of exit from mitosis; peptidyl-tyrosine dephosphorylation	0	0
10	S001371	93536	5291	SCAN domain-containing protein 3-like	nucleic acid binding†	0	1
11	S001371	105757	4777	Exonuclease 1	nuclease activity†	0	0
12	S001371	114355	2216	---NA---	---NA---	0	0
13	S001371	177573	1626	---NA---	---NA---	1	24
14	S001371	180913	3753	---NA---	---NA---	13	20
15	S001371	189603	4434	---NA---	---NA---	7	23
16	S001371	194620	13431	---NA---	---NA---	17	10
17	S001371	211460	3380	Uncharacterized protein	---NA---	2	6
18	S001371	220724	19622	Glucose dehydrogenase-like protein	pentose-phosphate shunt; oxidation-reduction process	30	10
19	S001371	288160	14504	---NA---	---NA---	24	14
20	S001371	312523	71582	Cyclic nucleotide-gated ion channel-like	ion transmembrane transport	106	10
21	S000353	4195	3150	---NA---	transferase activity†	0	0
22	S000353	8811	7060	Signal peptide peptidase-like 3	aspartic-type endopeptidase activity†	0	0
23	S000353	32793	9015	Synaptic vesicle 2-related protein	transmembrane transport	0	5
24	S000353	45528	1333	---NA---	---NA---	0	0
25	S000353	59330	32662	Serine threonine-kinase TAO1	protein phosphorylation	2	0
26	S000353	106087	3384	Calcium release-activated calcium channel protein 1	nervous system development, positive regulation of calcium ion transport, store-operated calcium entry	0	0
27	S000353	112268	13439	---NA---	---NA---	0	0
28	S000353	192650	89979	Craniofacial development protein 2-like	nucleic acid phosphodiester bond hydrolysis, RNA-dependent DNA biosynthetic process	0	0
29	S000353	283873	20043	JmjC domain-containing histone demethylation protein 1-like	DNA binding; zinc ion binding; protein binding†	3	0
30	S000353	306546	5775	Serine protease HTRA2, mitochondrial isoform X2	ectopic germ cell programmed cell death; spermatogenesis; positive regulation of apoptotic process; positive regulation of cysteine-type endopeptidase activity; mitochondrion organization	0	0
31	S000353	328247	7608	---NA---	---NA---	0	0
32	S000353	367122	2729	---NA---	---NA---	0	0
33	S000353	369945	2461	UDP-glucuronosyltransferase 2B15-like isoform X1	metabolic process	0	0
34	S000353	375105	1390	Histone RNA hairpin-binding protein	mRNA binding†	0	0
35	S000353	386136	22453	Uncharacterized protein	---NA---	2	0
36	S000353	439471	6167	Toll-like receptor 4	signal transduction	0	0
37	S000933	12358	3701	---NA---	---NA---	0	0
38	S000933	19732	2959	---NA---	---NA---	0	0
39	S000933	26577	6200	---NA---	---NA---	0	0
40	S000933	33616	23714	Uncharacterized protein LOC109859777, partial	---NA---	0	0
41	S000933	59837	4140	---NA---	---NA---	0	0
42	S000933	71297	6121	---NA---	---NA---	0	0
43	S000933	77843	1797	---NA---	---NA---	0	0
44	S000933	81513	6360	---NA---	---NA---	0	0
45	S000933	88266	2371	---NA---	---NA---	0	0
46	S000933	105356	15572	Exocyst complex component 4	---NA---	0	1
47	S000933	121587	4749	PREDICTED: nucleoporin Nup43	---NA---	0	0
48	S000933	132380	9036	Hypothetical protein L798_02504	---NA---	0	0
49	S000933	141349	28954	PREDICTED: uncharacterized protein LOC105384608 isoform X1	---NA---	0	0
50	S000933	224015	19478	PREDICTED: putative uncharacterized protein FLJ37770	---NA---	0	0
51	S000933	246013	1817	---NA---	---NA---	0	0
52	S000933	250034	6599	FLJ37770-like protein	---NA---	0	1
53	S000933	302606	3899	---NA---	---NA---	0	0
54	S000933	494452	18140	Conserved hypothetical protein	---NA---	0	0
55	S000933	591771	3494	Hypothetical protein L798_04682	---NA---	0	0
56	S000933	723088	15053	Prophenoloxidase 1	---NA---	0	1
57	S000933	741054	2495	---NA---	---NA---	0	1
58	S000933	749445	23031	---NA---	---NA---	0	1
59	S000933	1016167	6449	---NA---	---NA---	0	0
60	S000933	1057161	17702	Hypothetical protein L798_04684, partial	---NA---	1	1
61	S000933	1491836	4490	---NA---	---NA---	0	1
62	S000933	1549283	2027	---NA---	---NA---	0	0
63	S000933	1552516	13091	---NA---	---NA---	1	0
64	S000933	1619967	11623	Hypothetical protein L798_04682	---NA---	0	1
65	S000933	1631914	16568	Hypothetical protein	---NA---	0	0
66	S000933	1689073	22515	PREDICTED: uncharacterized protein LOC109042038	---NA---	2	0
†: biological process GO is not available, molecular function GOs are shown
