# Supplementary material
Source: publisher figshare collection journal article supplement (https://gsajournals.figshare.com/articles/dataset/_/7505762)
Supplement: Supplementary file 2 [file 2 › Table S6.xlsx]

## Sheet: Sheet1
Table S6. The identities and locations of conserved domains in the cyclic nucleotide-gated ion channels and hyperpolarization activated cyclic nucleotide-gated ion channels used for the protein phylogenetic tree construction
Organism	Common name	Gene name	Protein abbreviation	NCBI accession	Consrved domain name	Domain start	Domain end	E value
Anopheles gambiae	African malaria mosquito	AgaP_AGAP003349	AGAP	XP_003436450.1	Ion_trans	104	345	7.1e-28
Anopheles gambiae		AgaP_AGAP003349	AGAP	XP_003436450.1	Ion_trans_2	246	340	1.9e-07
Anopheles gambiae		AgaP_AGAP003349	AGAP	XP_003436450.1	cNMP	420	540	5.81e-21
Caenorhabditis elegans	Roundworm	Abnormal chemotaxis-2	TAX-2	NP_492427.3	Ion_trans	221	467	2.4e-18
Caenorhabditis elegans		Abnormal chemotaxis-2	TAX-2	NP_492427.3	cNMP	538	657	6.56e-29
Caenorhabditis elegans		Cyclic nucleotide-gated cation channel	TAX-4	NP_499033.1	Ion_trans	121	422	1.9e-19
Caenorhabditis elegans		Cyclic nucleotide-gated cation channel	TAX-4	NP_499033.1	cNMP	493	614	1.24e-24
Centruroides sculpturatus	Arisona bark scorpion	Cyclic nucletide-gated olfactory channel-like	CNGOL	NP_023223511.1	Ion_trans	195	435	1.6e-23
Centruroides sculpturatus		Cyclic nucletide-gated olfactory channel-like	CNGOL	NP_023223511.1	Ion_trans_2	335	429	4.1e-05
Centruroides sculpturatus		Cyclic nucletide-gated olfactory channel-like	CNGOL	NP_023223511.1	cNMP	506	625	1.61e-23
Danio rerio	Zebrafish	Cyclic nucletide-gated channel subunit a1a	CNGA1A	NP_001139095.1	Ion_trans	139	382	5.2e-25
Danio rerio		Cyclic nucletide-gated channel subunit a1a	CNGA1A	NP_001139095.1	cNMP	453	577	2.18e-25
Danio rerio		Cyclic nucletide-gated channel subunit a2a	CNGA2A	NP_001038211.1	Ion_trans	144	387	7.9e-33
Danio rerio		Cyclic nucletide-gated channel subunit a2a	CNGA2A	NP_001038211.1	cNMP	458	582	8.47e-23
Danio rerio		Cyclic nucletide-gated channel subunit a3a	CNGA3A	XP_021332877.1	Ion_trans	182	425	1.4e-25
Danio rerio		Cyclic nucletide-gated channel subunit a3a	CNGA3A	XP_021332877.1	cNMP	496	617	2.12e-23
Danio rerio		Cyclic nucletide-gated channel subunit a4	CNGA4	XP_002663442.3	Ion_trans	53	296	6.7e-28
Danio rerio		Cyclic nucletide-gated channel subunit a4	CNGA4	XP_002663442.3	cNMP	367	491	3.86e-26
Danio rerio		Cyclic nucletide-gated channel subunit b1a	CNGB1A	XP_696619.6	Ion_trans	760	994	2.5e-13
Danio rerio		Cyclic nucletide-gated channel subunit b1a	CNGB1A	XP_696619.6	cNMP	1066	1185	2.27e-23
Danio rerio		Cyclic nucletide-gated channel subunit b3.1	CNGB3.1	XP_021326040.1	cNMP	607	731	3.89e-22
Danio rerio		Potassium/sodium hyperpolarization activated nucleotide-gated channel 3	HCN3	XP_686078.4	Ion_trans_N	179	222	4.6e-20
Danio rerio		Potassium/sodium hyperpolarization activated nucleotide-gated channel 3	HCN3	XP_686078.4	Ion_trans	223	486	1.3e-23
Danio rerio		Potassium/sodium hyperpolarization activated nucleotide-gated channel 3	HCN3	XP_686078.4	cNMP	556	669	2.27e-23
Drosophila melanogaster	Common fruit fly	Cyclic nucletide-gated channel subunit a	CNGA	NP_001188960.1	Ion_trans	282	532	2.1e-27
Drosophila melanogaster		Cyclic nucletide-gated channel subunit a	CNGA	NP_001188960.1	cNMP	604	725	1.08e-20
Drosophila melanogaster		Cyclic nucletide-gated channel subunit b	CNGB	NP_611607.2	Ion_trans	468	704	9.8e-21
Drosophila melanogaster		Cyclic nucletide-gated channel subunit b	CNGB	NP_611607.2	cNMP	775	894	3.83e-21
Drosophila melanogaster		Cyclic nucletide-gated channel-like	CNGL	NP_001245691.1	Ion_trans	240	481	2.4e-26
Drosophila melanogaster		Cyclic nucletide-gated channel-like	CNGL	NP_001245691.1	Ion_trans_2	382	476	1.1e-07
Drosophila melanogaster		Cyclic nucletide-gated channel-like	CNGL	NP_001245691.1	cNMP	556	676	7.67e-21
Drosophila melanogaster		Dopamine receptor (outgroup)	DR	AAC47161.1	7TM_GPCR_Srsx	119	315	3e-08
Drosophila melanogaster		Dopamine receptor (outgroup)	DR	AAC47161.1	7tm_1	125	474	5.5e-85
Drosophila melanogaster		Dopamine receptor (outgroup)	DR	AAC47161.1	7TM_GPCR_Srsx	396	489	9.1e-08
Drosophila melanogaster		I[[h]] channel	IH	NP_001033848.1	Ion_trans_N	709	752	9e-27
Drosophila melanogaster		I[[h]] channel	IH	NP_001033848.1	Ion_trans	753	916	3.7e-14
Drosophila melanogaster		I[[h]] channel	IH	NP_001033848.1	cNMP	1124	1241	1.1e-21
Homo sapiens	Human	Cyclic nucletide-gated channel subunit a1	CNGA1	XP_005248106.2	Ion_trans	239	483	8.1e-31
Homo sapiens		Cyclic nucletide-gated channel subunit a1	CNGA1	XP_005248106.2	cNMP	554	678	1.54e-25
Homo sapiens		Cyclic nucletide-gated channel subunit a2	CNGA2	AAI26303.1	Ion_trans	140	383	2.2e-30
Homo sapiens		Cyclic nucletide-gated channel subunit a2	CNGA2	AAI26303.1	cNMP	454	578	8.94e-22
Homo sapiens		Cyclic nucletide-gated channel subunit a3	CNGA3	XP_011508856.1	Ion_trans	223	466	1.5e-26
Homo sapiens		Cyclic nucletide-gated channel subunit a3	CNGA3	XP_011508856.1	cNMP	537	661	1.77e-25
Homo sapiens		Cyclic nucletide-gated channel subunit a4	CNGA4	XP_016872796.1	Ion_trans	34	276	8.3e-28
Homo sapiens		Cyclic nucletide-gated channel subunit a4	CNGA4	XP_016872796.1	cNMP	348	474	3.26e-24
Homo sapiens		Cyclic nucletide-gated channel subunit b1	CNGB1	NP_001273059.1	Ion_trans	650	882	2.1e-17
Homo sapiens		Cyclic nucletide-gated channel subunit b1	CNGB1	NP_001273059.1	cNMP	956	1075	2.8e-23
Homo sapiens		Cyclic nucletide-gated channel subunit b3	CNGB3	NP_061971.3	Ion_trans	218	453	4.4e-20
Homo sapiens		Cyclic nucletide-gated channel subunit b3	CNGB3	NP_061971.3	cNMP	524	643	5.99e-23
Homo sapiens		Hyperpolarization activated nucleotide-gated channel 4	HCN4	NP_005468.1	Ion_trans_N	218	261	5.5e-23
Homo sapiens		Hyperpolarization activated nucleotide-gated channel 4	HCN4	NP_005468.1	Ion_trans	262	525	1.8e-25
Homo sapiens		Hyperpolarization activated nucleotide-gated channel 4	HCN4	NP_005468.1	cNMP	595	708	2.27e-23
Limulus polyphemus	Atlantic horseshoe crab	Cyclic nucletide-gated olfactory channel-like	CNGOL	XP_022241104.1	Ion_trans	2	224	6.9e-16
Limulus polyphemus		Cyclic nucletide-gated olfactory channel-like	CNGOL	XP_022241104.1	Ion_trans_2	121	218	2.9e-05
Limulus polyphemus		Cyclic nucletide-gated olfactory channel-like	CNGOL	XP_022241104.1	cNMP	295	418	1.24e-24
Mizuhopecten yessoensis	Ezo giant scallop	Cyclic nucletide-gated olfactory channel-like	CNGOL	XP_021352252.1	Ion_trans	160	400	3.6e-20
Mizuhopecten yessoensis		Cyclic nucletide-gated olfactory channel-like	CNGOL	XP_021352252.1	Ion_trans_2	300	394	2.4e-05
Mizuhopecten yessoensis		Cyclic nucletide-gated olfactory channel-like	CNGOL	XP_021352252.1	cNMP	472	590	2.42e-18
Mus musculus	House mouse	Cyclic nucletide-gated channel subunit a1	CNGA1	XP_006503772.1	Ion_trans	171	415	2e-31
Mus musculus		Cyclic nucletide-gated channel subunit a1	CNGA1	XP_006503772.1	cNMP	486	610	3.31e-25
Mus musculus		Cyclic nucletide-gated channel subunit a2	CNGA2	NP_031750.2	Ion_trans	142	385	2.8e-30
Mus musculus		Cyclic nucletide-gated channel subunit a2	CNGA2	NP_031750.2	cNMP	456	580	4.54e-23
Mus musculus		Cyclic nucletide-gated channel subunit a3	CNGA3	NP_001268939.1	Ion_trans	147	389	1.5e-30
Mus musculus		Cyclic nucletide-gated channel subunit a3	CNGA3	NP_001268939.1	cNMP	461	585	5.09e-26
Mus musculus		Cyclic nucletide-gated channel subunit a4	CNGA4	XP_017177672.1	Ion_trans	34	276	1.1e-28
Mus musculus		Cyclic nucletide-gated channel subunit a4	CNGA4	XP_017177672.1	cNMP	348	472	1.54e-25
Mus musculus		Cyclic nucletide-gated channel subunit b1	CNGB1	NP_001182342.1	Ion_trans	732	964	5.6e-18
Mus musculus		Cyclic nucletide-gated channel subunit b1	CNGB1	NP_001182342.1	cNMP	1038	1157	7.91e-23
Mus musculus		Cyclic nucletide-gated channel subunit b3	CNGB3	NP_038955.1	Ion_trans	210	445	5.7e-21
Mus musculus		Cyclic nucletide-gated channel subunit b3	CNGB3	NP_038955.1	cNMP	516	635	5.99e-23
Mus musculus		Hyperpolarization activated nucleotide-gated channel 4	HCN4	NP_001074661.1	Ion_trans_N	218	261	1.2e-23
Mus musculus		Hyperpolarization activated nucleotide-gated channel 4	HCN4	NP_001074661.1	Ion_trans	262	525	2.2e-25
Mus musculus		Hyperpolarization activated nucleotide-gated channel 4	HCN4	NP_001074661.1	cNMP	595	708	2.27e-23
Zootermopsis nevadensis	Dampwood termite	Cyclic nucletide-gated olfactory channel-like	CNGOL	KDR12169.1	Ion_trans	83	323	1.5e-22
Zootermopsis nevadensis		Cyclic nucletide-gated olfactory channel-like	CNGOL	KDR12169.1	Ion_trans_2	224	318	3.6e-05
Zootermopsis nevadensis		Cyclic nucletide-gated olfactory channel-like	CNGOL	KDR12169.1	cNMP	398	518	1.64e-20
