# Supplementary material
Source: publisher figshare collection journal article supplement (https://gsajournals.figshare.com/articles/dataset/_/7505762)
Supplement: Supplementary file 2 [file 2 › Table S7.xlsx]

## Sheet: Sheet1
Table S7. Descriptions of top blast hits and the E values for unannotated predicted genes in Table 3 from a blast using relaxed E-value cutoff of 100
Gene index	Scaffold	Start position (base)	Gene length (base)	Best blast hit description	E value
3	S003497	186416	1334	3-oxoacyl-[acyl-carrier-protein] synthase, mitochondrial	0
12	S001371	114355	2216	Histone-lysine N-methyltransferase EHMT2	12.5
13	S001371	177573	1626	Coiled-coil and C2 domain-containing protein 1A	9.39
14	S001371	180913	3753	Voltage-dependent L-type calcium channel subunit alpha-1S	44.5
15	S001371	189603	4434	Cingulin isoform X1	0.526
16	S001371	194620	13431	AAEL000747-PA	1.13
19	S001371	288160	14504	Simulator of interferon genes-like	0.00462
21	S000353	4195	3150	RNA polymerase II elongation factor ELL20-like	63.3
24	S000353	45528	1333	---NA---
27	S000353	112268	13439	RNA directed DNA-polymerase from mobile element jockey	22.8
31	S000353	328247	7608	Retinol dehydrogenase 7-like	0.525
32	S000353	367122	2729	---NA---
37	S000933	12358	3701	---NA---
38	S000933	19732	2959	Nose resistant to fluoxetine protein 6-like	7.1
39	S000933	26577	6200	Spindle E	72.7
41	S000933	59837	4140	---NA---
42	S000933	71297	6121	---NA---
43	S000933	77843	1797	Phosphomannose isomerase type I	56.1
44	S000933	81513	6360	Uncharacterized protein Dmoj_GI26744	2.83
45	S000933	88266	2371	Fibrous sheath-interacting 2-like	5.77
51	S000933	246013	1817	Toll-like receptor 2	0.0296
53	S000933	302606	3899	FAM188B2	22.8
57	S000933	741054	2495	Phenoloxidase 2	0.242
58	S000933	749445	23031	Hemolymph lipopolysaccharide-binding-like	0.00543
59	S000933	1016167	6449	Ubiquitin-associated and SH3 domain-containing protein B-like	32.2
61	S000933	1491836	4490	---NA---
62	S000933	1549283	2027	Major histocompatibility complex class I-related gene	19.8
63	S000933	1552516	13091	RNA directed DNA-polymerase from mobile element jockey-like	51.3
