# Supplementary material
Source: publisher figshare collection journal article supplement (https://gsajournals.figshare.com/articles/dataset/_/7505762)
Supplement: Supplementary file 7 [file 3]



{

SM000100  
cNMP



```

674 : erProIleSerProProProAlaProAsnThrLeuSerProProSerPheArgLeuGlnP : 693
      ! !!! !||| !! !|||!|||!|||... !|||!|||!||| !|||! !! !! !! !|
      alAlaThrSerSerSerProAlaProGlyProLeuSerProAlaSerSerLeuSerProP
52681 : TGGCGACCTCTTCGTCGCCGCCGCCCGGGCCTCTGTCTCCCGCGTCTGTCTGTGCCAC : 52622

694 : ro >>>> Target Intron 9 >>>> ProGluGlnGluProGlnGluGlnGluVa : 703
      || 219 bp |||..!::!!:: ! !::!! :!!
      ro++ ++ProSerGluAspGluThrGlnProGlnAr
52621 : CGgt.....agCCCTCGGAGGACGAAACGCAGCCTCAGCG : 52373

704 : l{Il} >>>> Target Intron 10 >>>> {e}GlyAlaGlyLeuProLeuIleG : 712
      !{! } 1089 bp {!}|||!|||!|||:!! !|||:!!
      g{Ar}++ ++{g}GlyAlaGlyValArgLeuLeuS
52372 : G{AG}gt.....ag{A}GGTGCGGGTGTCCGACTGCTCT : 51257

713 : lnArgLeuLeuLeuLeuLysGlnLysGluAspHisGluArgLeuThrMetGlnAlaThrA : 732
      .!::!||| ! !|||! ...|||!||..! !... !! !::! |||:!!
      erLysLeuAlaThrLeuThrSerLysGluSerSerSerGlyProAsnAlaIleAlaAlaS
51256 : CGAAGCTCGCTACGCTACCAAGAGAGTCTCTCCGCCCAACGCCATCGCCGCTT : 51197

733 : laThrValAlaAlaAspValLeuAla{T} >>>> Target Intron 11 >>>> { : 741
      !! !::..!! !! !::! !::!{.} 11852 bp {
      erProThrThrProIleAlaThrSer{V}+- ++{
51196 : CCCCCACGACGCCCATCGCCACCTCC{G}ga.....aa{ : 39317

742 : hr}ThrValLysThrGlnGlnGluValAspProLysSerMetGlnSerIleValSerPro : 760
      .!}|||:!!::.. !.!. ! !|||!|| !..!::!! !! !::!! !!
      al}ThrIleSerHisAsnIleValSerAspProProGlnValLeuProGluIleThrAla
39316 : TC}ACAATCAGCCACAACATCGTTTCCGATCCTCCGAGGTACTTCTGAAATTACCGCG : 39261

761 : SerGluAsnLysLeuLysGluLysThrThr{Gl} >>>> Target Intron 12 >> : 771
      |||...!! !::!!::!! !::!!|||{ } 106 bp
      SerSerLysIlePheGlnHis***SerThr{Cy}++
39260 : TCCAGTAAGATATTCCAACATTAGTCGACC{TG}gt..... : 39224

772 : >> {u}AsnCysSerGluGluGluLysLysSerSerPheGluTyrSerIleGluThrAl : 789
      { }||| !::!! !|||... !||| !.!.|||:!! !.!.|||
      ++{s}AsnArgAsnThrGluSerCysPheLeuSerThrHisTyrAlaThrSerThrMe
39223 : ..ag{C}AATCGCAATACAGAGTCCTGTTTTCTGTCAACTCACTACGCAACTTCAACAAT : 39068

790 : aSerSerValGly >>>> Target Intron 13 >>>> IleThrGluLysThrVa : 799
      !|||!..! !||| 1874 bp :!! !||| :!!
      tSerLysSerGly++ ++ValCysGluProSerSe
39067 : GTCCAAATCCGGGgt.....agGTTTGCAACCTTCATC : 37164

800 : lAspGlnProProValArgValMetValProSerValLeuSerGlnAlaGluThrSerAl : 819
      ! ! ! !||| ! ! ! !. ! !::!! !..!..!! !::!! !
      rProLeuAlaProSerSerTyrAlaAlaIleAlaAlaSerAspAspThrAlaAlaThrPr
37163 : CCCGCTGGCTCCGTCCTCGTATGCCGCCATCGCCGCTCCGATGACACCGCCGCCACCCC : 37104

820 : aAlaSerProGln<->ArgArgArgProLysProSerLeuLeuArgLeuGlnLys<-><- : 837
      !|||!|||!|||:!! !::! !|||!|| !|| ! !|||!||| !
      oAlaSerProLysProLysProArgProAlaProLeuArgLeuArgSerValProGlyGl
37103 : CGCATCACCAAAGCCGAAGCCGCGACCCGCGCACTGCGCTCCGCTCAGTTCCCGGGGG : 37044

838 : >AspThrLysSerTyrMetSerIleAspAspLeuSerProGluTyrSerGlyLeuProPh : 856
      ! !.!!||| !||| !|||!|||!|||!|||!|||!|||:!! !|||!|||
      yGlyAlaLysArgTyrAlaSerIleAspAspLeuSerProGluTyrAlaProLeuProPh
37043 : CGGCGCTAAACGCTACGCCTCCATCGACGACCTGTACCCGAATACGCGCGCTGCCTTT : 36984

857 : eValLysLysLeuLysIleLeuAsnGluArgGlnLysLeuAlaGluLeuGluGlnLys : 876
      !|||!|||!|||!|||!|||!|||!|||!|||!|||!|||!|||:!!
      eValLysLysLeuLysIleLeuAsnGluArgGlnLysLeuPheGluLeuGluArgGln++
36983 : CGTCAAGAAGCTCAAATTCTCAACGAGCGACAGAAGCTCTTGAAGTGGAGAGACAggt : 36924

877 : >>>> Target Intron 14 >>>> Val<->AlaHisValLeuMetArgSerSerSe : 885

```

```

      3014 bp          ||| ||| !..||| | |||!!!!|
                    ++ValGluAlaGlyAlaLeuSerArgSerTrpSe
36923 : .....agGTGGAAGCGGGTGC GTTGTC CCGCAGCTGGAG : 33880
    886 : rLeuAspSerSerAsnAlaValSerCysAlaSerGlyGlySerGlyAspSerAlaGluAs :   905
        |||!!!!!!|.....!|||! !!!!!!!|!!!!| ||| !! :
rLeuAspSerGlyGlyCysGlySerGlyThrGlyAlaSerSerGly-----ValGlyAs
33879 : TCTGGA CT CGGGTGGGTGTGGGAGCGGGACCGAGCGAGCAGTGGAA-----GTGGGCGA : 33826
    906 : nSerLeuAspProMetAsnLeuThrArgSerHisSerGluAlaSerAlaMetGlnTyrVa :   925
        !!! ||| !!!!!...!|||! !!!!!!!|!!!!| ||| !! :
pGlyAlaAspAlaLeuGlyLeuThrArgSerSerSerSerGluAlaSerAlaMetAlaTyrVa
33825 : CGGCGCTGACGCCCTAGGCCTCACGCGTTCATCATCCGAAGCCTCCGCCATGGCGTATGT : 33766
    926 : lArgSerGlnGlnHisLysLeuProGln >>>> Target Intron 15 >>>> As :   935
        |||!!!!!!| |||!!!!!!| 8736 bp
lArgAlaGlnGlnLeuArgLeuAlaAsn+-++Th
33765 : GCGCGCGCAGCAGCTGCGACTGGCCAACgc.....agAC : 25000
    936 : pProSerThrGluAla{A} >>>> Target Intron 16 >>>> {la}GlnSerL :   944
        |||!!!! ||| { } 5256 bp { } !..!!!! :
rProCysLysGluLys{A}++ ++{rg}AspGluP
24999 : ACCATGCAAGAAAAA{A}gt.....ag{GG}GATGAAC : 19717
    945 : euThrSerProGluSerAsnGluThrLeuGluArgArgAsnLeuLysSerIleLeuLysL :   964
        ! ||||||||||||||||||||||||||||||||||||||| :
roHisSerProGluSerAsnGluThrLeuGluArgArgHisLeuLysSerIleLeuLysL
19716 : CACATTACCAGAGAGCAACGAGACCTTGAACGCCGCATCTGAAGAGCATCCTCAAGA : 19657
    965 : ysLeuSerAlaSerSerLeuPheSerGlySerThrGluGluAspLysGluSerSerSerI :   984
        ||||||||||||||||||| |||!!!!.. |||!!!! |||!!!! :
ysLeuSerAlaSerAsnLeuLeu-----SerSerGluSerSerpThrGlySerProCysG
19656 : AGTTGTGCGCCTCCAATTTGTTG-----TCGAGTGAGAGCGACACGGGAAGCCCTTGTG : 19603
    985 : leSerGluLysSerGluIleSerAlaMetLysGlyIleProThrAspLeuProThrAlaL :  1004
        !..!! !!..||| !!!!!!!! ! !!!!! |||
lyAspGlySerSerThrValThrGlySerGlyAlaSerPro-----
19602 : GAGACGGGAGCAGTACGGTGACGGGGT CGGGGCGAGTCCC----- : 19561
  1005 : ysSerSerAsnValAsnMetGlnLysLeuMetArgAlaProThrIleGluGlyTyrAlaA :  1024
        !! ! ! !!!!!!!|::|::|::|::|::|::|::|::|::|::|::|::| :
--ArgArgProAlaAspLeuArgArgLeuLeuArgAlaProThrValGluGlyTyrAlaA
19560 : --CGACGCCCTGCGGACCTGCGACGCTTGCTACGGGCGCCACCGTCGAAGGATACGCG : 19504
  1025 : laArgHisSerLysLeuIleLysSerValThrPheAsnArgAspThrLeuGlnSerProP :  1044
        ||||||||||||||| !||||||||||||||||||||| :
laArgHisSerLysLeuCysLysSerValThrPheAsnArgAspThrLeuGlnSerProP
19503 : CGCGACATTC AAGCTGTGCAAGAGCGTCACTTCAATCGAGACACCTGCAGAGTCCGC : 19444
  1045 : roAlaThr{A} >>>> Target Intron 17 >>>> {la}ThrThrProThrLys :  1052
        ||!..! {!!} 1499 bp { }!!!! ! ! ! |||
roGlyAsp{G}++ ++{lu}SerMetGluArgLys
19443 : CCGGTGAC{G}gt.....ag{AA}TCAATGAAAAGAAAG : 17921
  1053 : PheProGlnGluAlaSerGlySerLeuPheProLeuLeuLysProLeuThrAlaAsnGlu :  1072
        !! |...||!..! !! !!!!! ! !! ! ! ||| ||| !! :
SerLeuSerGluCysHisValThrProGluCysSerTyrLysThrLeuPheValTrpArg
17920 : AGTCTTAGTGAGTGCCATGT CACGCTGAATGTCTTACAAAACCTTGTTTGTATGGCGT : 17861
  1073 : LysAsnPhePheArgProSerLeuLeuLeuProSerHisAlaSerLeu{G} >>>> Ta :  1089
        :! ! ! ! ! . |||||:!!! ! !||| !... !!!!!:. :
GluAlaCysLeuSerProSerValTyrLysProLeuArgTyrAsnIle{H}++
17860 : GAAGCTTGCTGTGTCACGCTCCGTCTACAAGCCTTAAGGTATAATATC{C}gt..... : 17807
  1090 : rget Intron 18 >>>> {lu}GluGluTyrPheSerGluValIleValGlyIleLy :  1101
        4304 bp {!}!!!!|!!!!!!!!!!!!|!!!!!!!!!!!!|

```

```

++[is]AspGluTyrPheGlyGluValIleGlyGlyIleLy
17806 : .....ag{AC}GACGAATACTTCGGGGAGGTGATCGGC GGCA TCAA : 13470

    1102 : sGlnValIleGlnGlyHisLeu >>>> Target Intron 19 >>>> GluAspVa : 1111
          |||||::!|!|!|||||                809 bp           |||!::!!
    13469 : sGlnValLeuGlnAlaHisLeu++                  ++GluGluIL
          GCAGGTGCTGCAGGCGCATTGgt.....agGAGGAGAT : 12631

    1112 : lGlnAsnLysPheGlnSerGlnPheGlnSerLeuGluLeuGluValLysArgArgAspGl : 1131
          !!!!!:!!|!!!|!!!!|               !!!!!:!!|!!!!|
    12630 : eGlnSerLysPheGlnArgArgPheGlnSerLeuGluLeuGluValArgLysArgAspGl
          TCAGAGCAAGTTTCAACGTCGCTTCAGTCCCTGGAGCTGGAGGTGCGCAAGCGTGACGA : 12571

    1132 : uIleIleSerGlnLeuGlnLysArgIleHisGluLeuGluValCys : 1146
          |||||!!!!!!!!!!!!!!!!!!!!!!|.!.|!!!!|
    12570 : uIleIleSerGlnLeuGlnLysArgIleArgGluLeuGluValCys
          AATCATCAGTCAATTACAGAAGCGCATCCGCGAACTCGAGGTATGT : 12524

```
