# Supplementary material
Source: publisher figshare collection journal article supplement (https://gsajournals.figshare.com/articles/dataset/_/7505762)

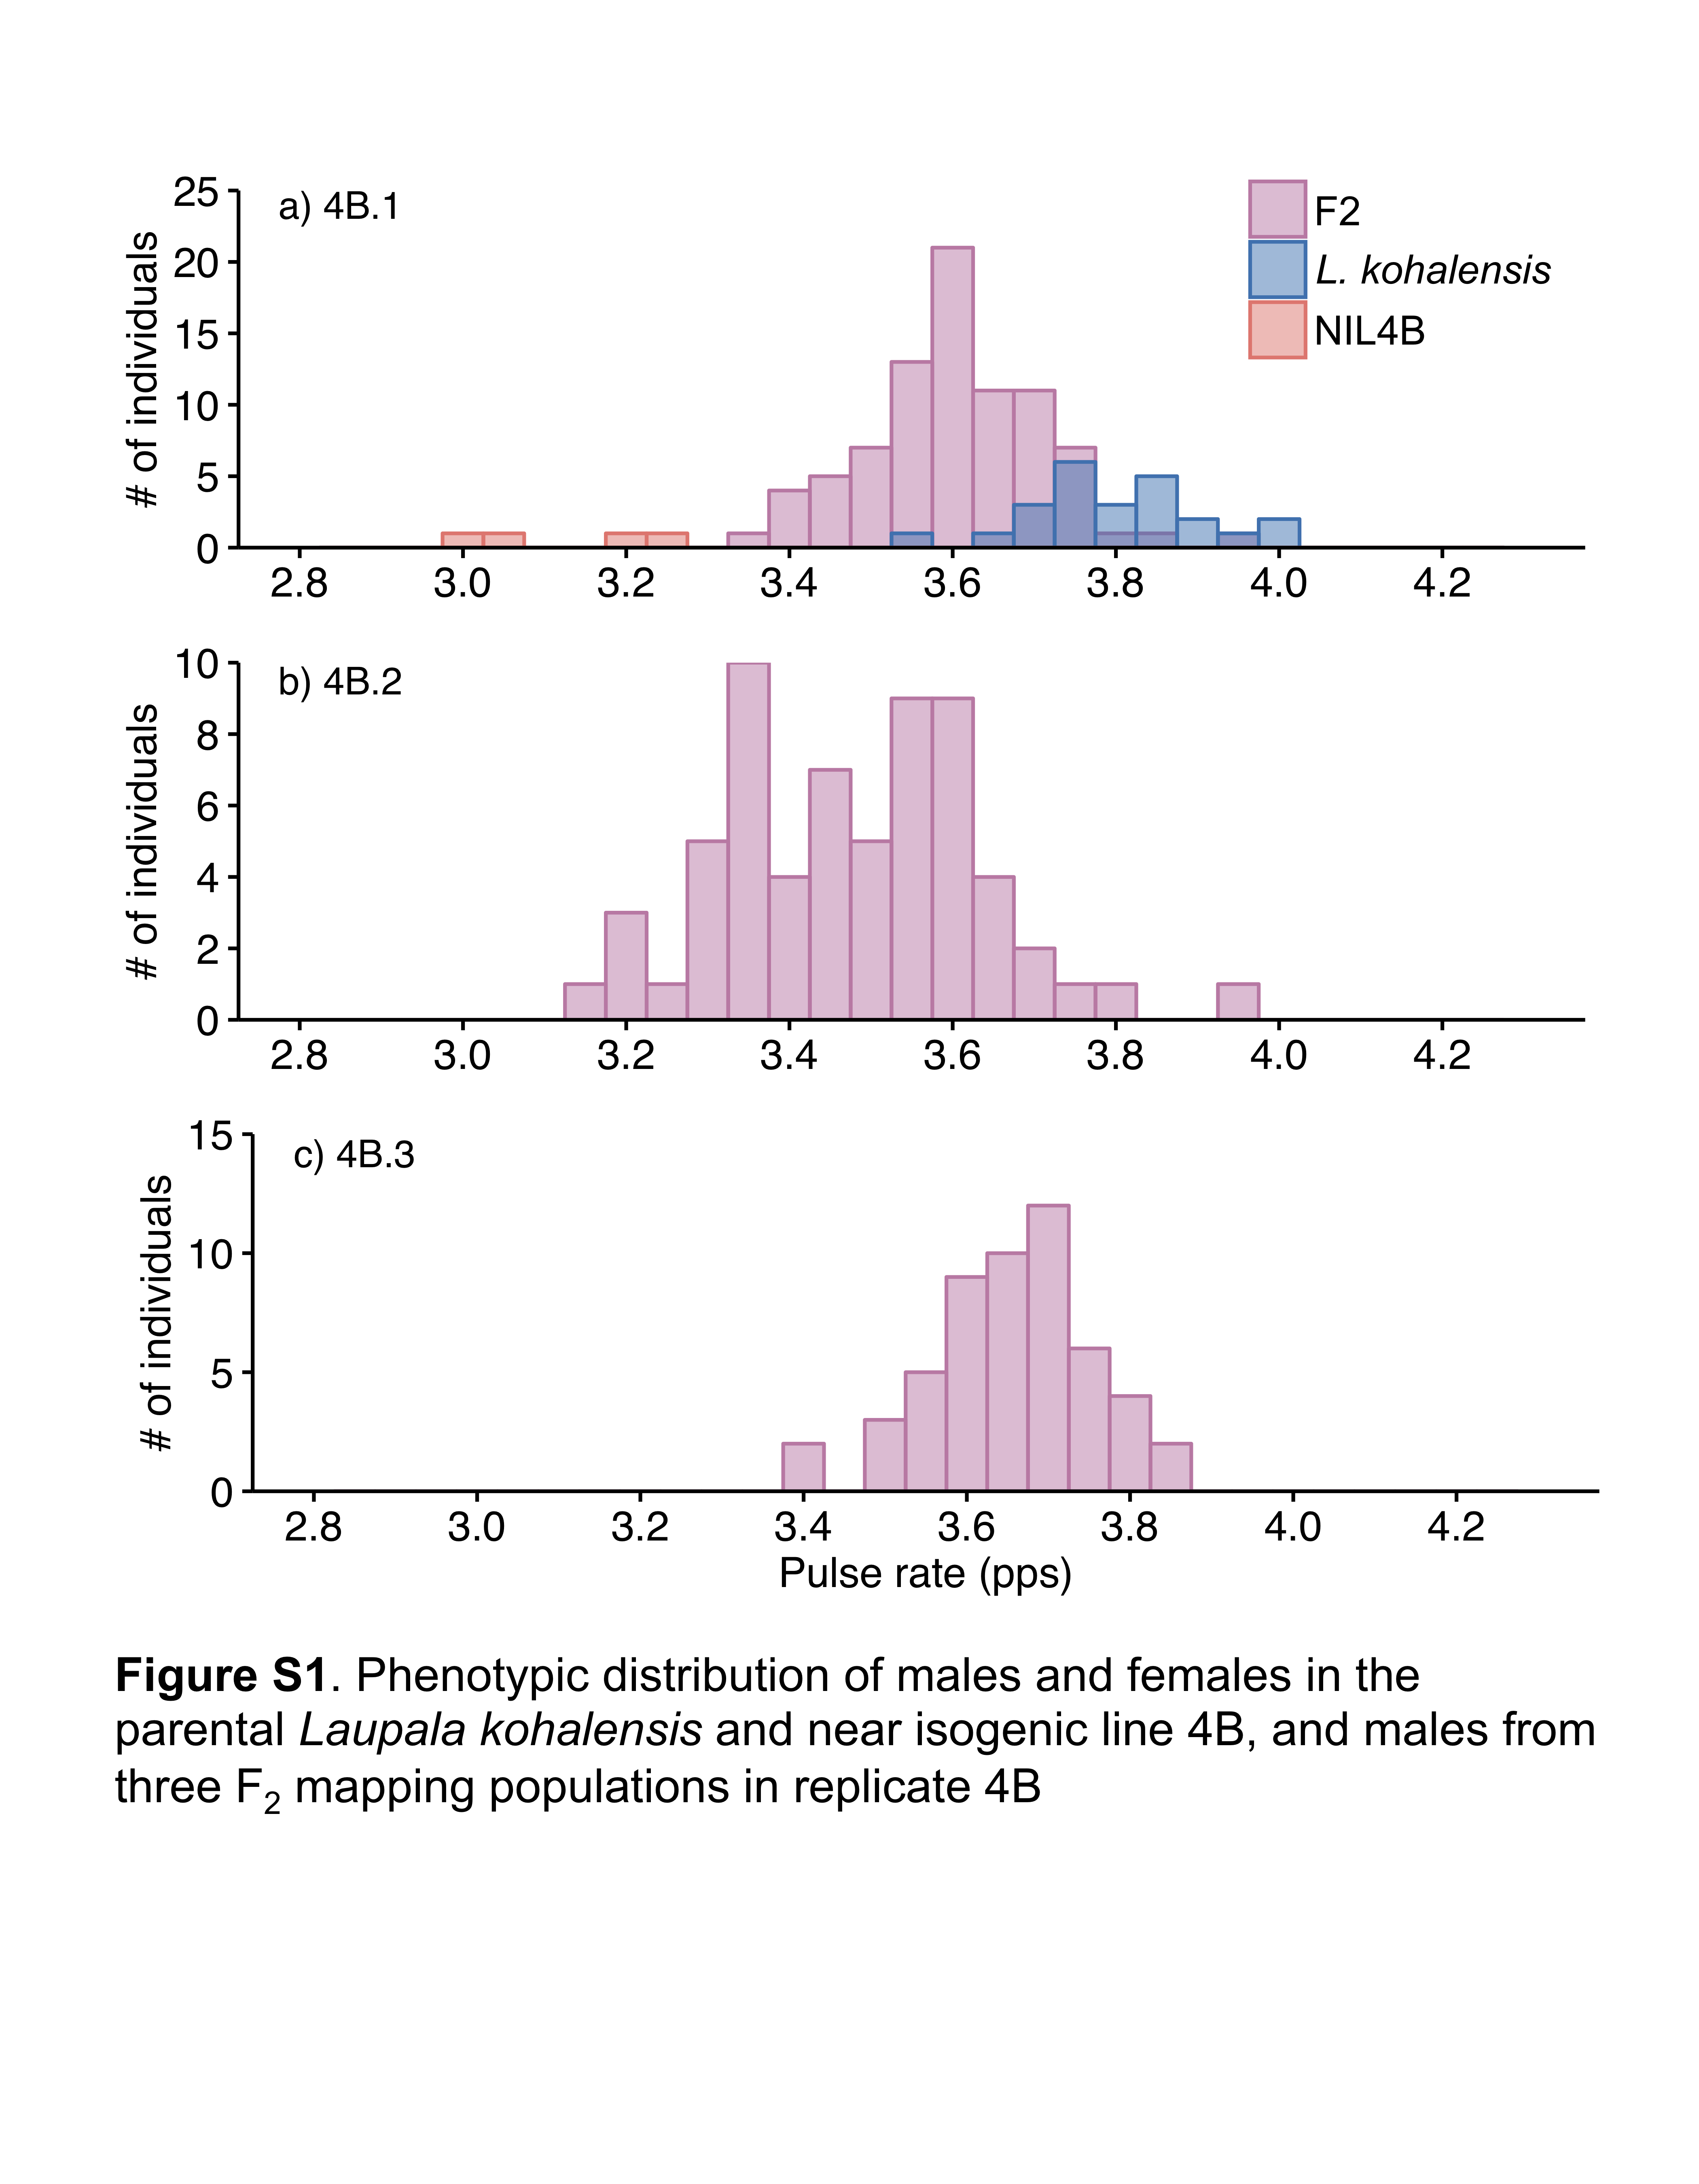

Supplement: Supplementary file 2 [file 2 › Figure S1.jpg]

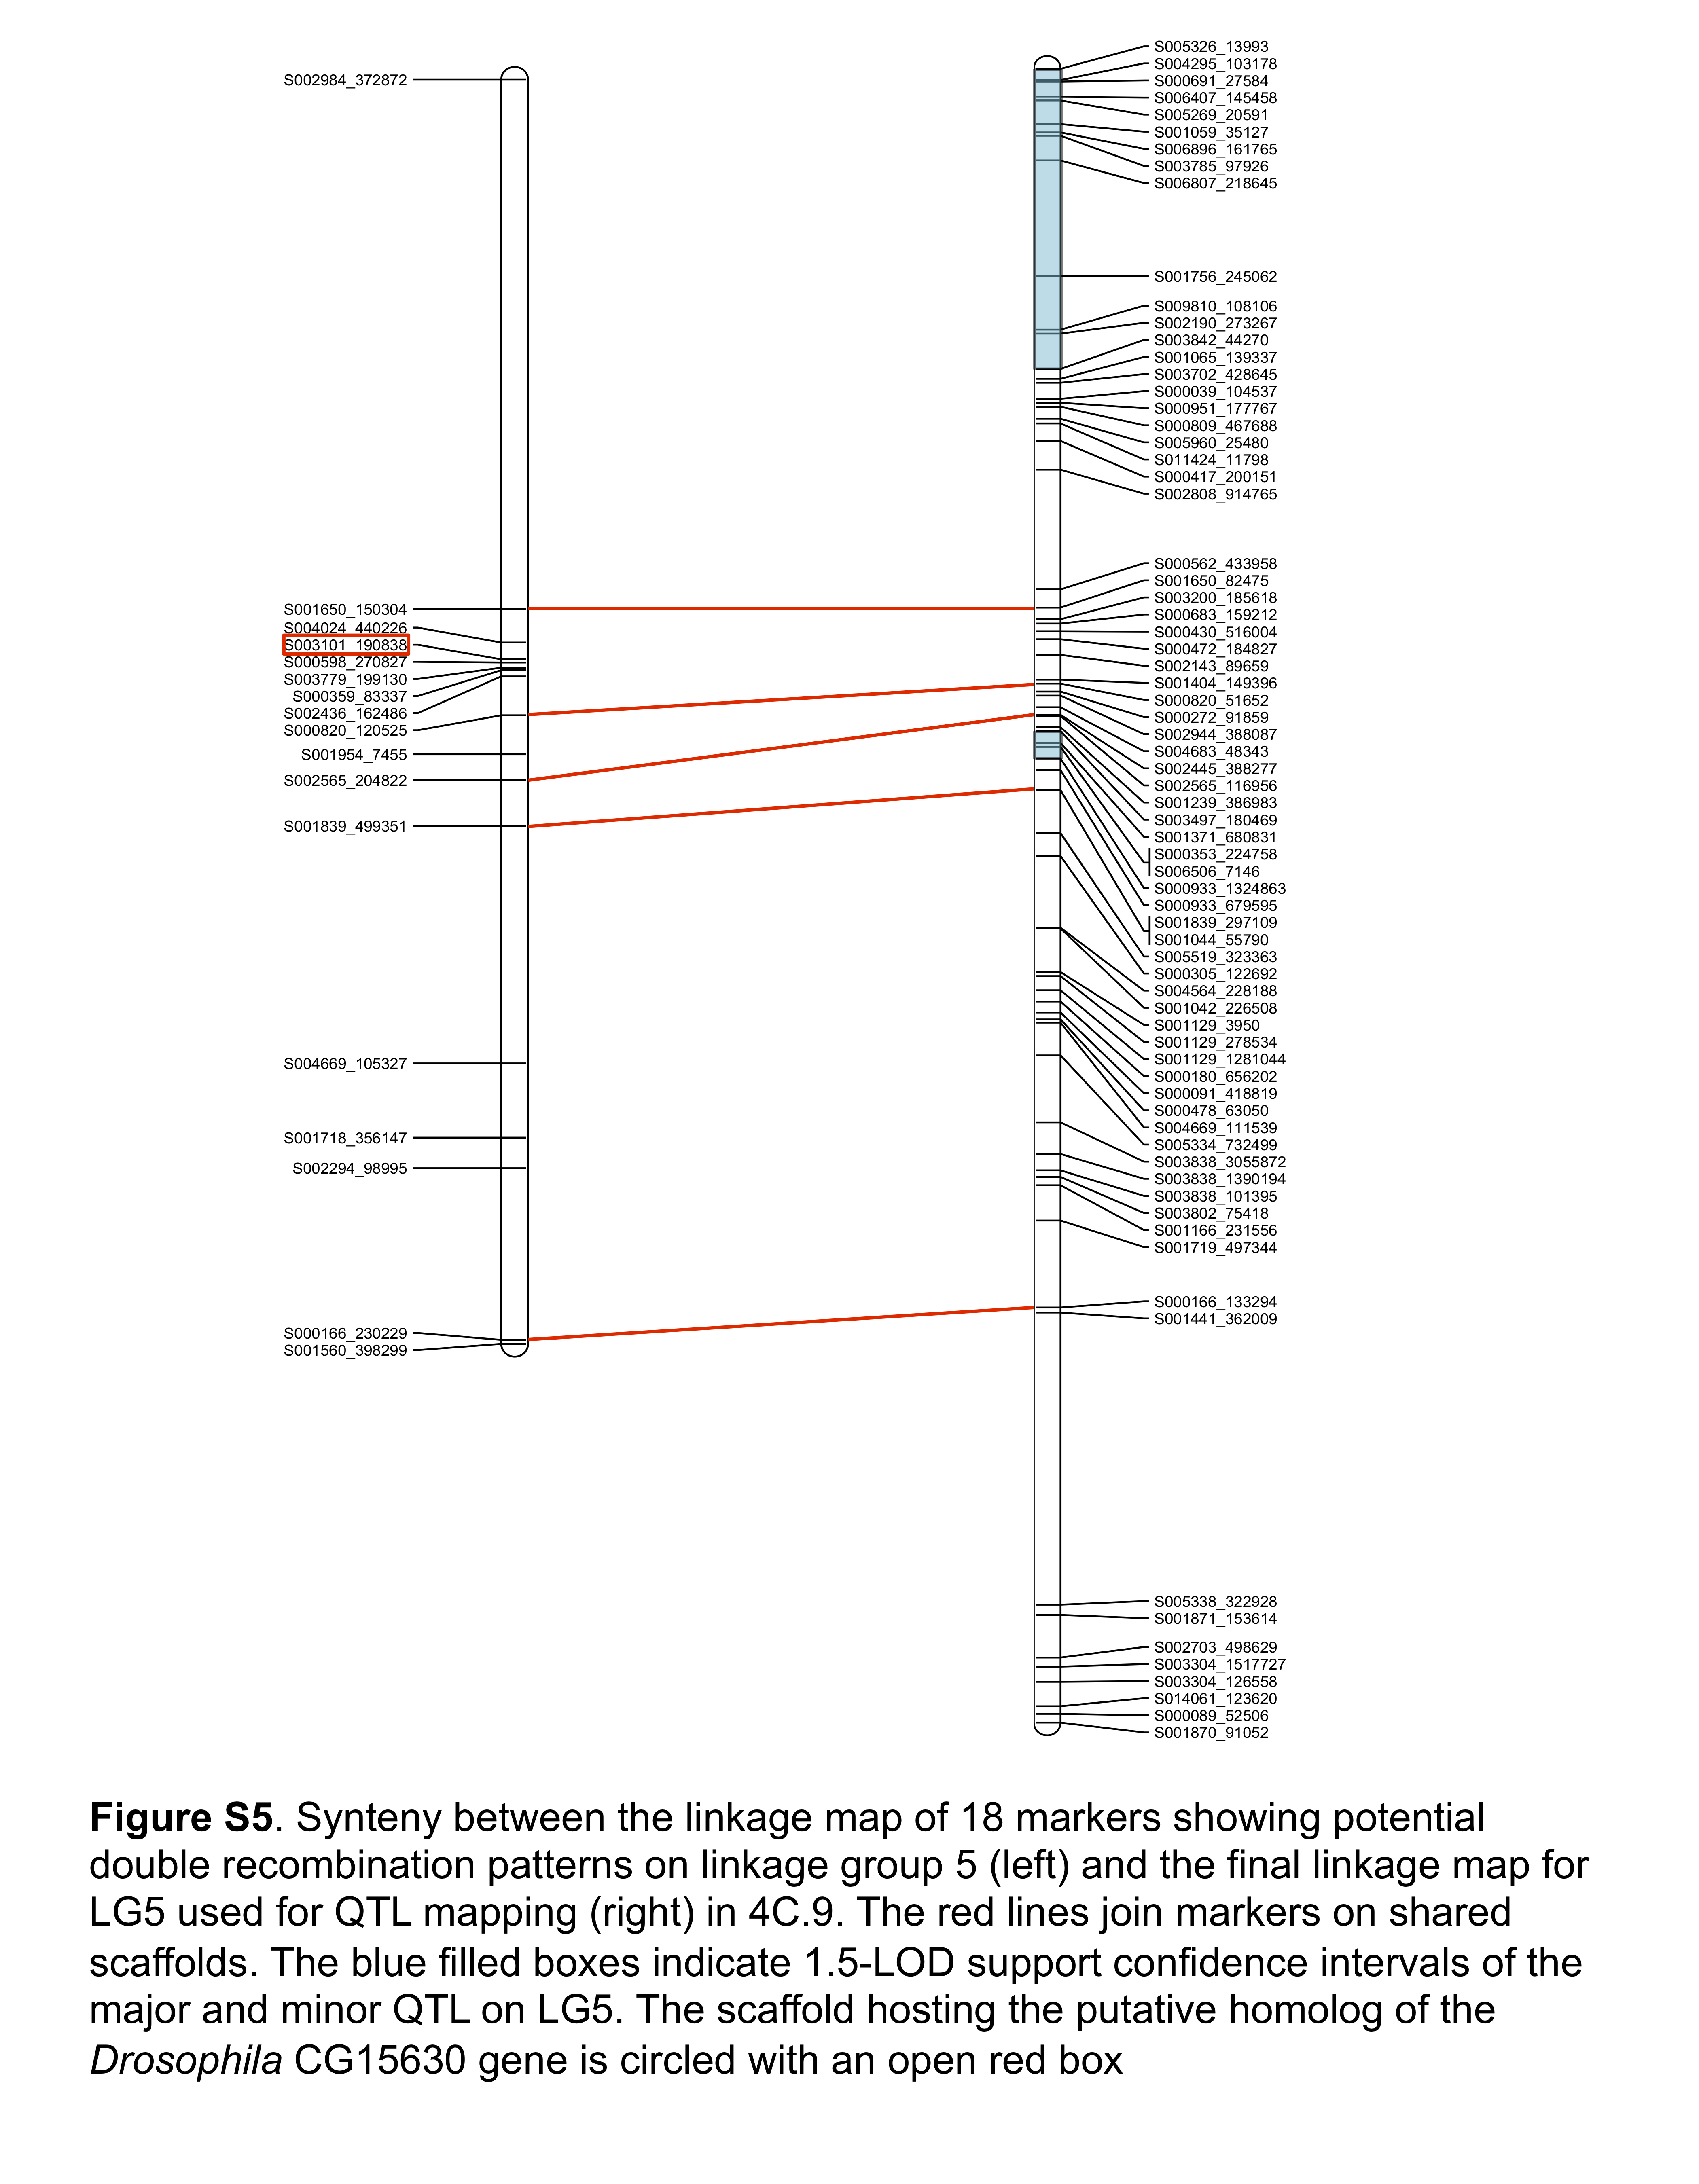

Supplement: Supplementary file 2 [file 2 › Figure S5.jpg]
